# Supplementary material for: Synthesis and evaluation of antimicrobial activity, cytotoxic and pro-apoptotic effects of novel spiro-4H-pyran derivatives
Source: PubMed Central journal article supplement (PMC9070039; doi:10.1039/c9ra03196k), 2019-08-09
Supplement: RA-009-C9RA03196K-s001.pdf [file RA-009-C9RA03196K-s001.pdf]

## Supporting Information

### Synthesis and evaluation of cytotoxic activity and pro-apoptotic effects of novel spiro-4*H*-pyran derivatives on A549 cancer cells

Fatemeh Safari,\* Hajar Hosseini, Mohammad Bayat\* and Ashkan Ranjbar

*Chemistry Department, Imam Khomeini International University, Qazvin, Iran*

*(Phone: +98 281 33780040; fax: +98 281 33780040; e-mail: bayat\_mo@yahoo.com, m.bayat@sci.ikiu.ac.ir)*

#### The Table of Contents

| Title                                                                                                       | Page  |
|-------------------------------------------------------------------------------------------------------------|-------|
| Title, author's name, address and table of contents                                                         | 1     |
| Experimental Section; General remarks                                                                       | 2     |
| <b>Figure 1.</b> Structure of all products <b>5</b>                                                         | 3     |
| <sup>1</sup> H and <sup>13</sup> C NMR and IR and Mass spectrums of <b>5a</b>                               | 4-7   |
| <sup>1</sup> H and <sup>13</sup> C NMR and Mass spectrums of <b>5b</b>                                      | 8-10  |
| <sup>1</sup> H and <sup>13</sup> C NMR and Mass spectrums of <b>5c</b>                                      | 11-13 |
| <sup>1</sup> H and <sup>13</sup> C NMR and IR and Mass and D <sub>2</sub> O exchange spectrums of <b>5d</b> | 14-17 |
| <sup>1</sup> H and <sup>13</sup> C NMR and IR and Mass spectrums of <b>5e</b>                               | 18-21 |
| <sup>1</sup> H and <sup>13</sup> C NMR and IR and Mass spectrums of <b>5f</b>                               | 22-25 |
| <sup>1</sup> H and <sup>13</sup> C NMR and IR and Mass spectrums of <b>5g</b>                               | 26-29 |
| <sup>1</sup> H and <sup>13</sup> C NMR and IR and Mass spectrums of <b>5h</b>                               | 30-33 |
| <sup>1</sup> H and <sup>13</sup> C NMR and IR and Mass spectrums of <b>5i</b>                               | 34-37 |
| <sup>1</sup> H and <sup>13</sup> C NMR and IR spectrums of <b>5j</b>                                        | 38-40 |

## Experimental Section

### General remarks:

Melting points were measured on an Electrothermal 9100 apparatus. Mass spectra were recorded with an Agilent 5975C VL MSD with Triple-Axis Detector operating at an ionization potential of 70 eV.  $^1\text{H}$  and  $^{13}\text{C}$  NMR spectra were measured (DMSO) with a Bruker DRX-300 AVANCE spectrometer at 300 and 75 MHz, respectively. IR spectra were recorded on a Bruker Tensor 27,  $\bar{\nu}$  in  $\text{cm}^{-1}$ . All NMR spectra at room temperature were determined in  $\text{DMSO}-d_6$ . Chemical shifts are reported in parts per million ( $\delta$ ) downfield from an internal tetramethylsilane reference. Coupling constants ( $J$  values) are reported in Hertz (Hz), and spin multiplicities are indicated by the following symbols: s (singlet), d (doublet), t (triplet), q (quartet), m (multiplet). All chemicals were purchased from Merck or Aldrich and were used without further purification.

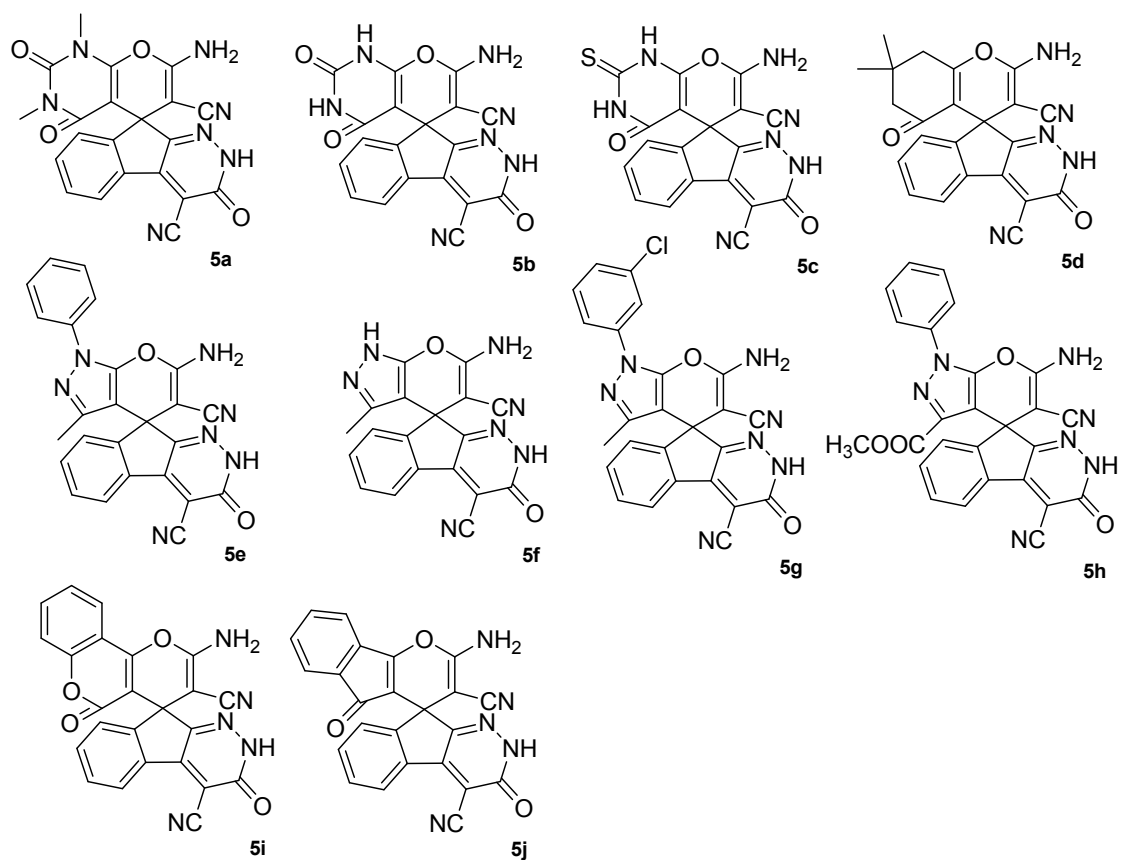

**Figure 1.** Structure of all products **5**

The structures of all products **5a-j** were deduced from their  $^1\text{H}$  NMR, and  $^{13}\text{C}$  NMR, IR and Mass spectra (see the Supporting Information)

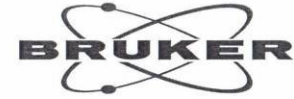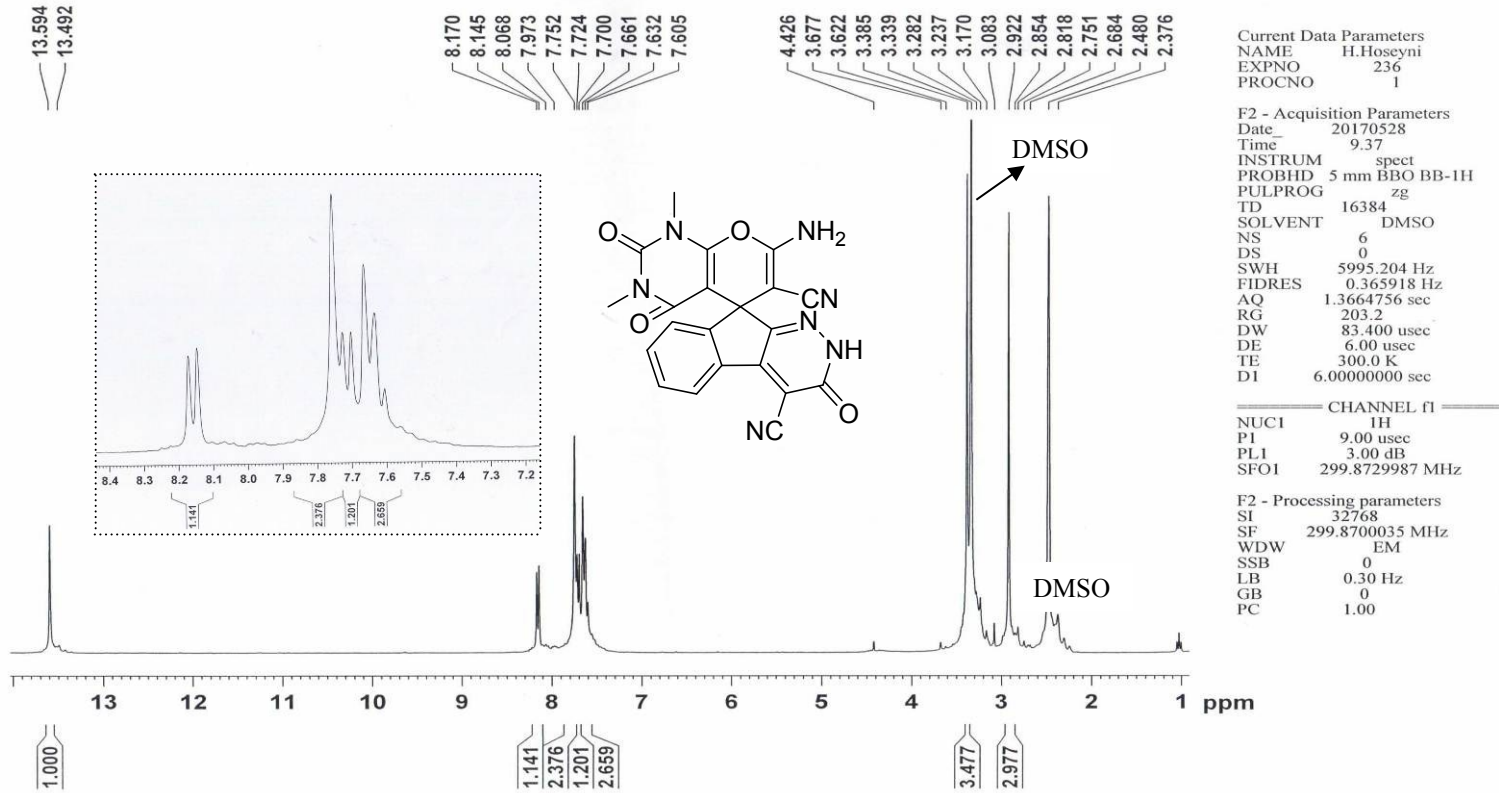

<sup>1</sup>H NMR of 5a

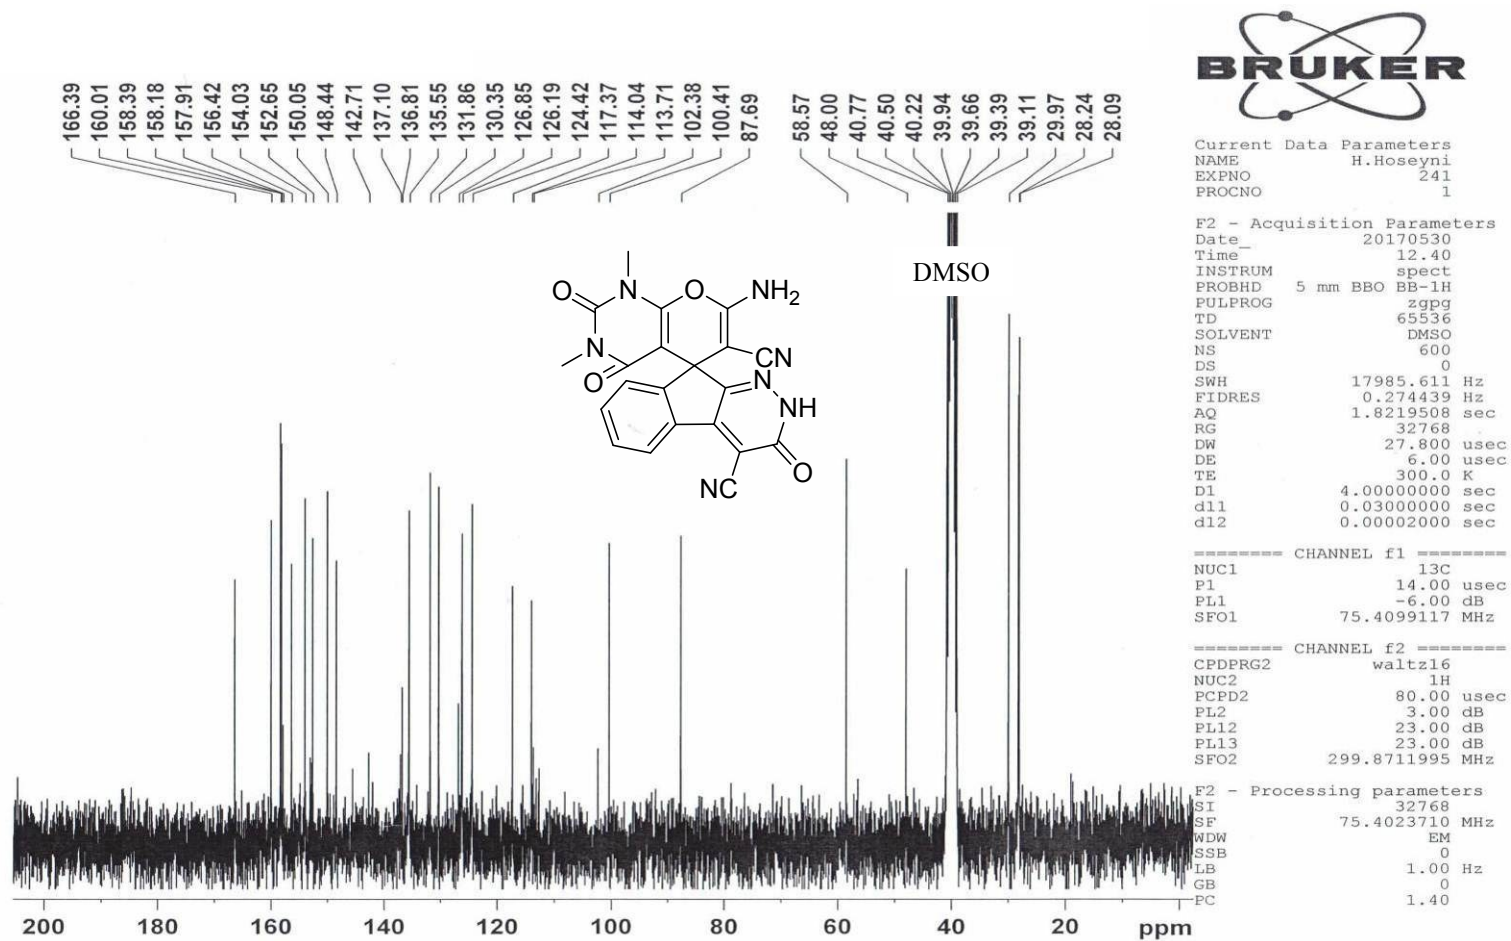 $^{13}\text{C}$  NMR of 5a

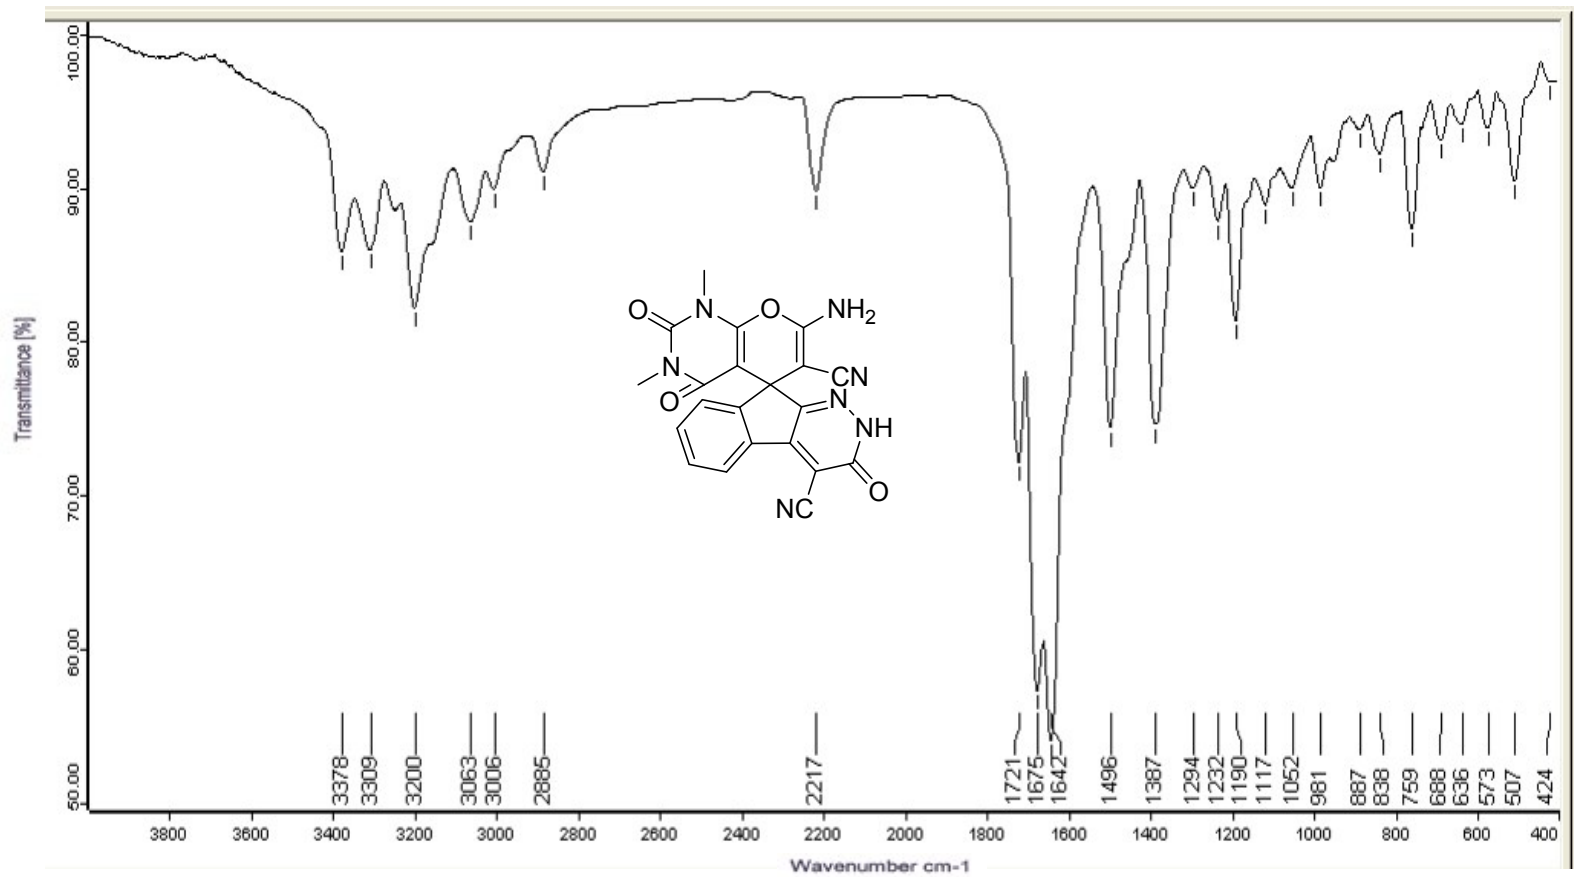

IR of 5a

Abundance

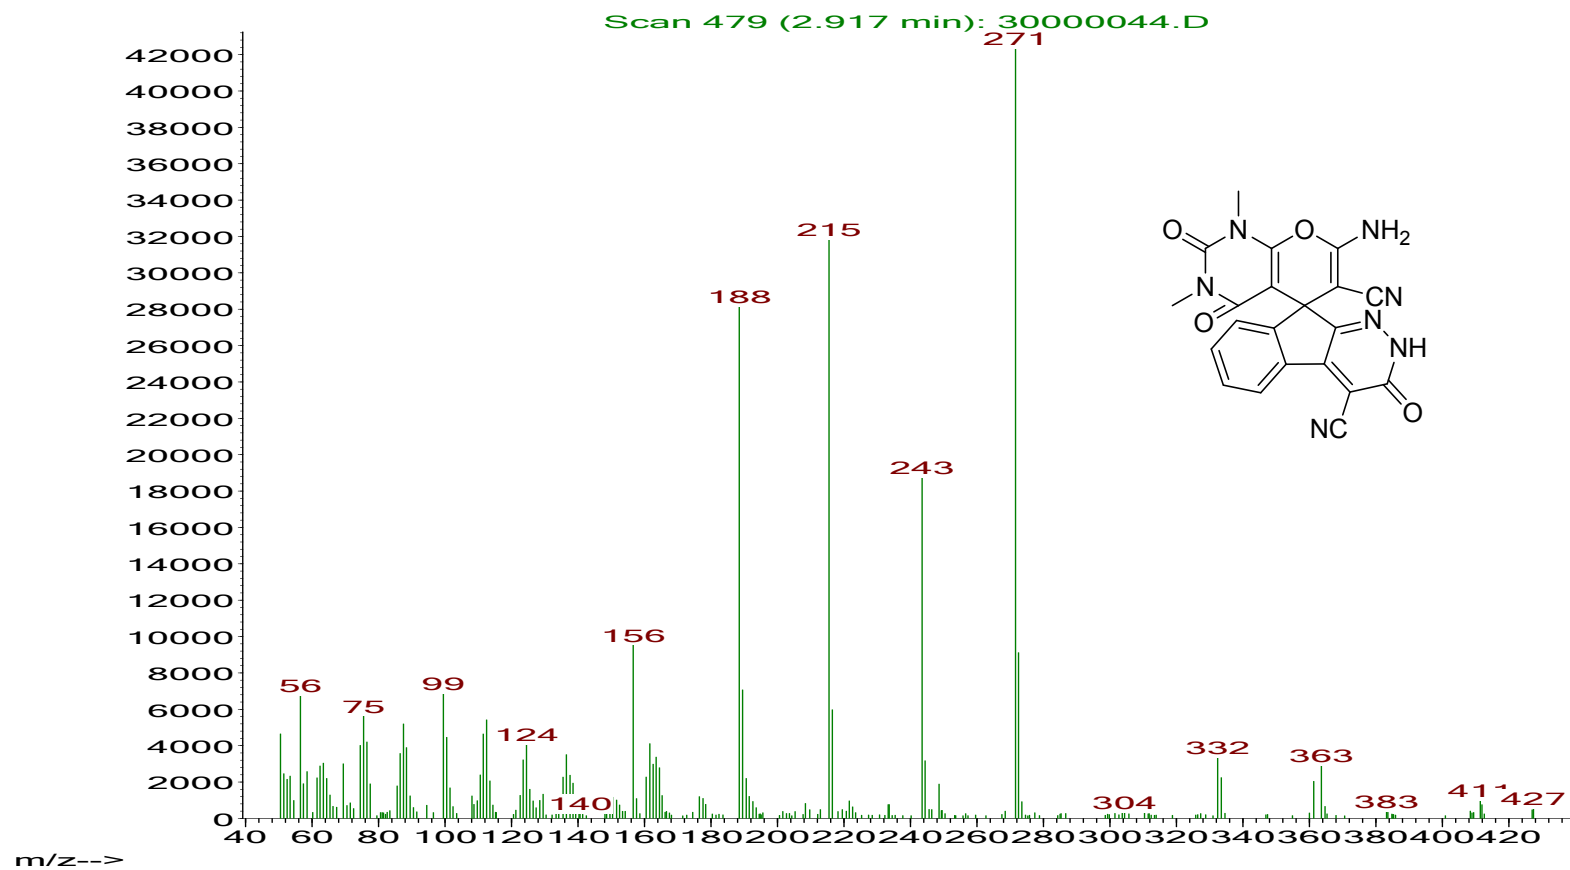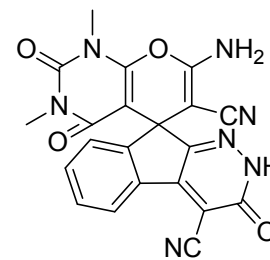

MS of 5a

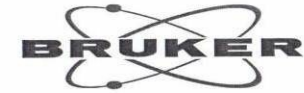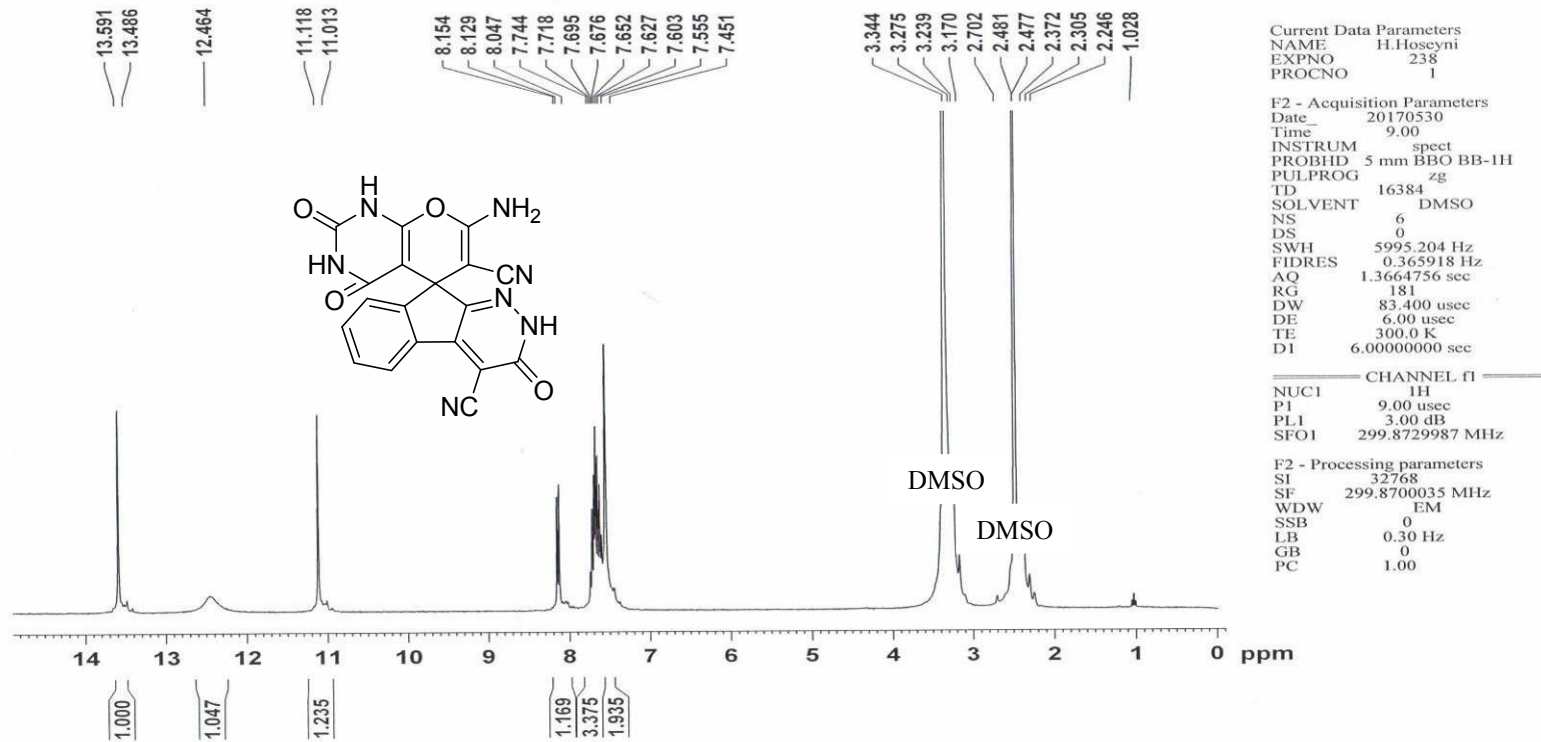



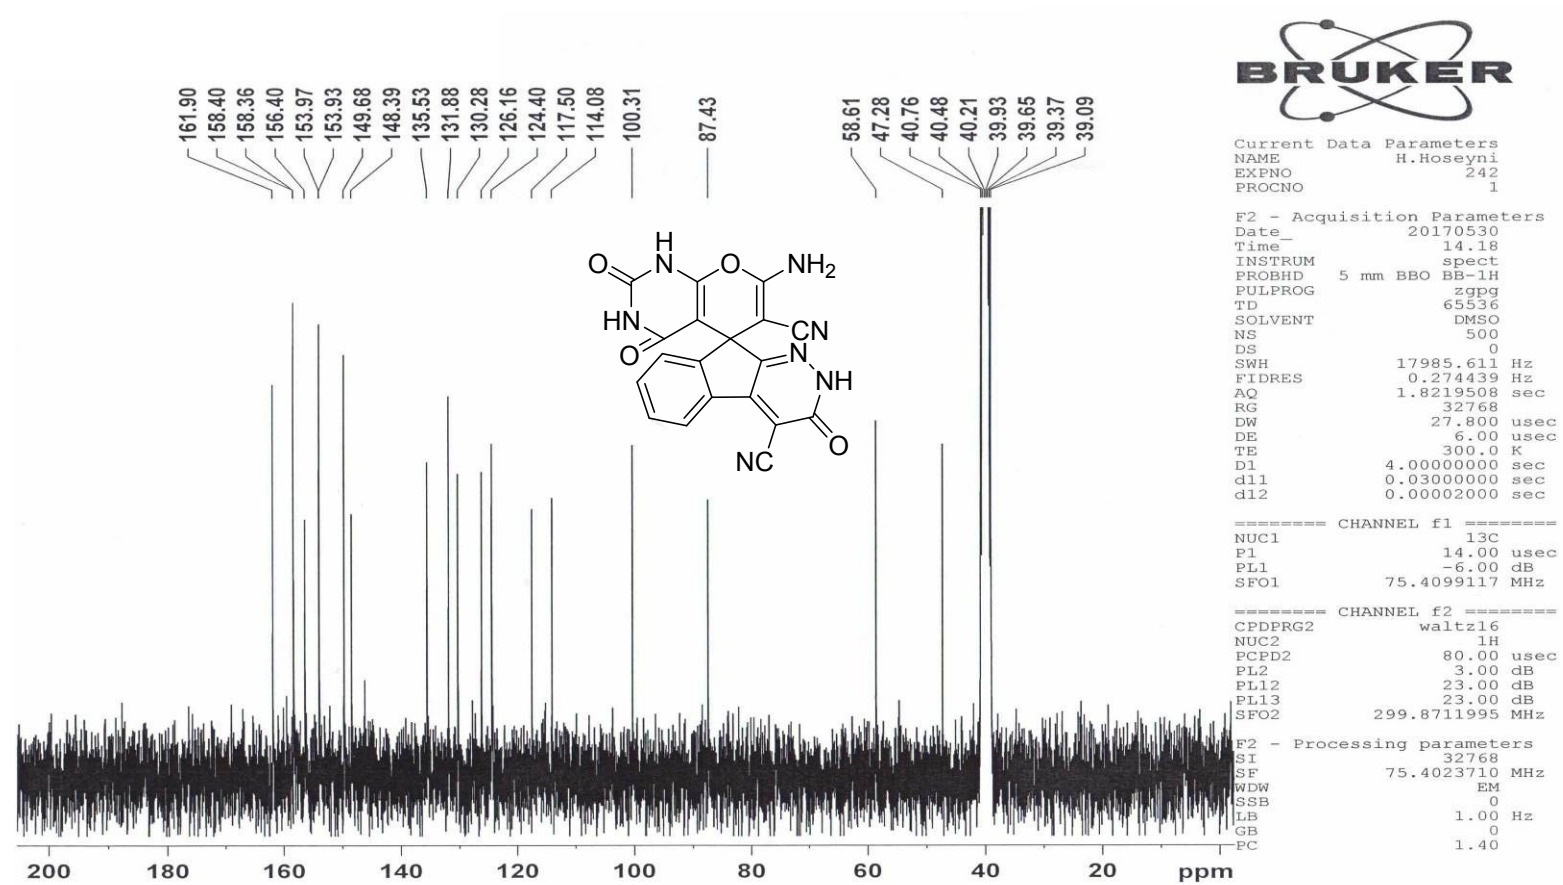<sup>13</sup>C NMR of 5b

Abundance

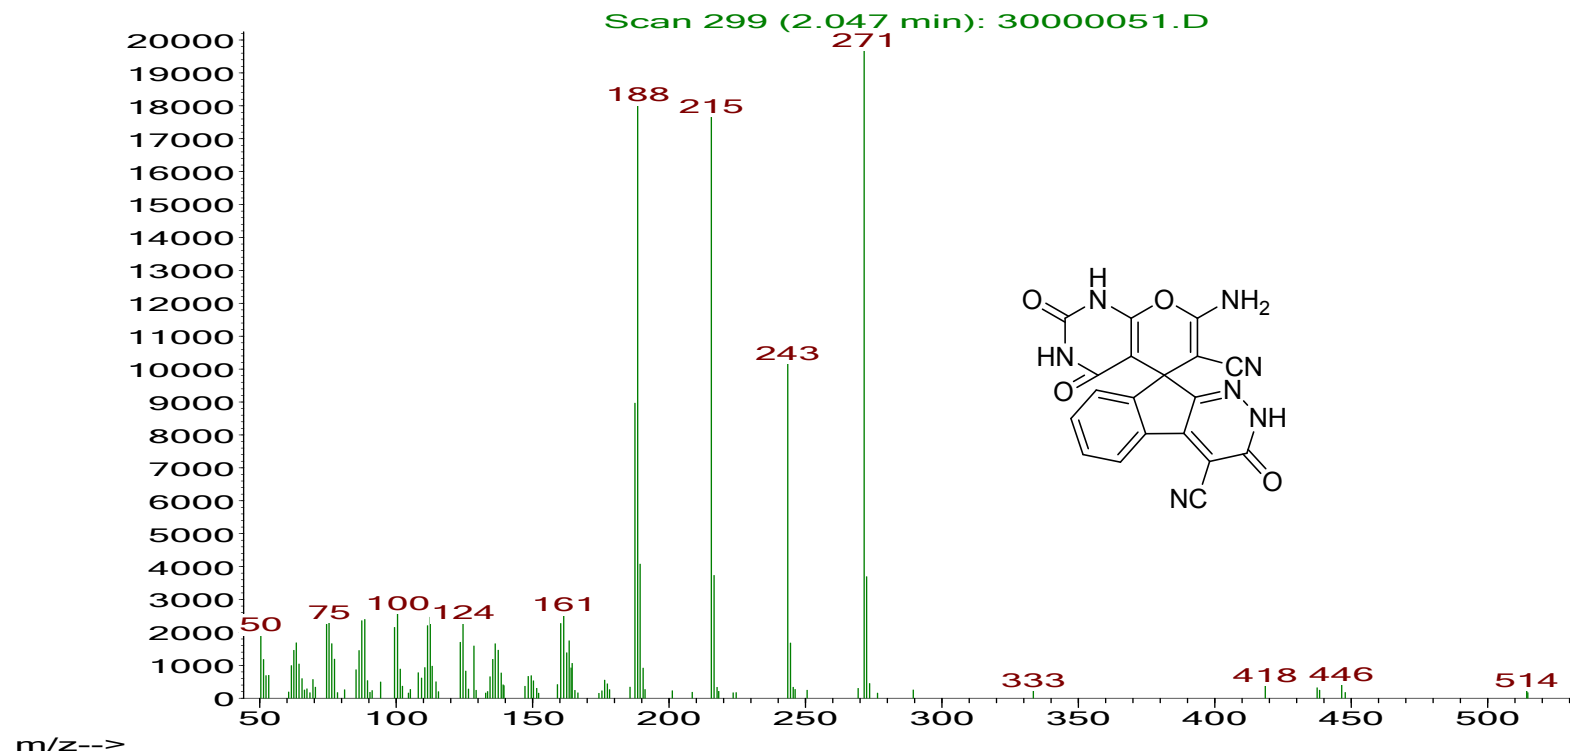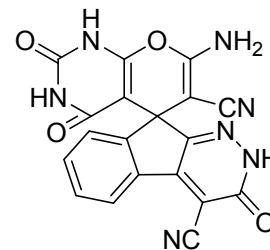

MS of 5b

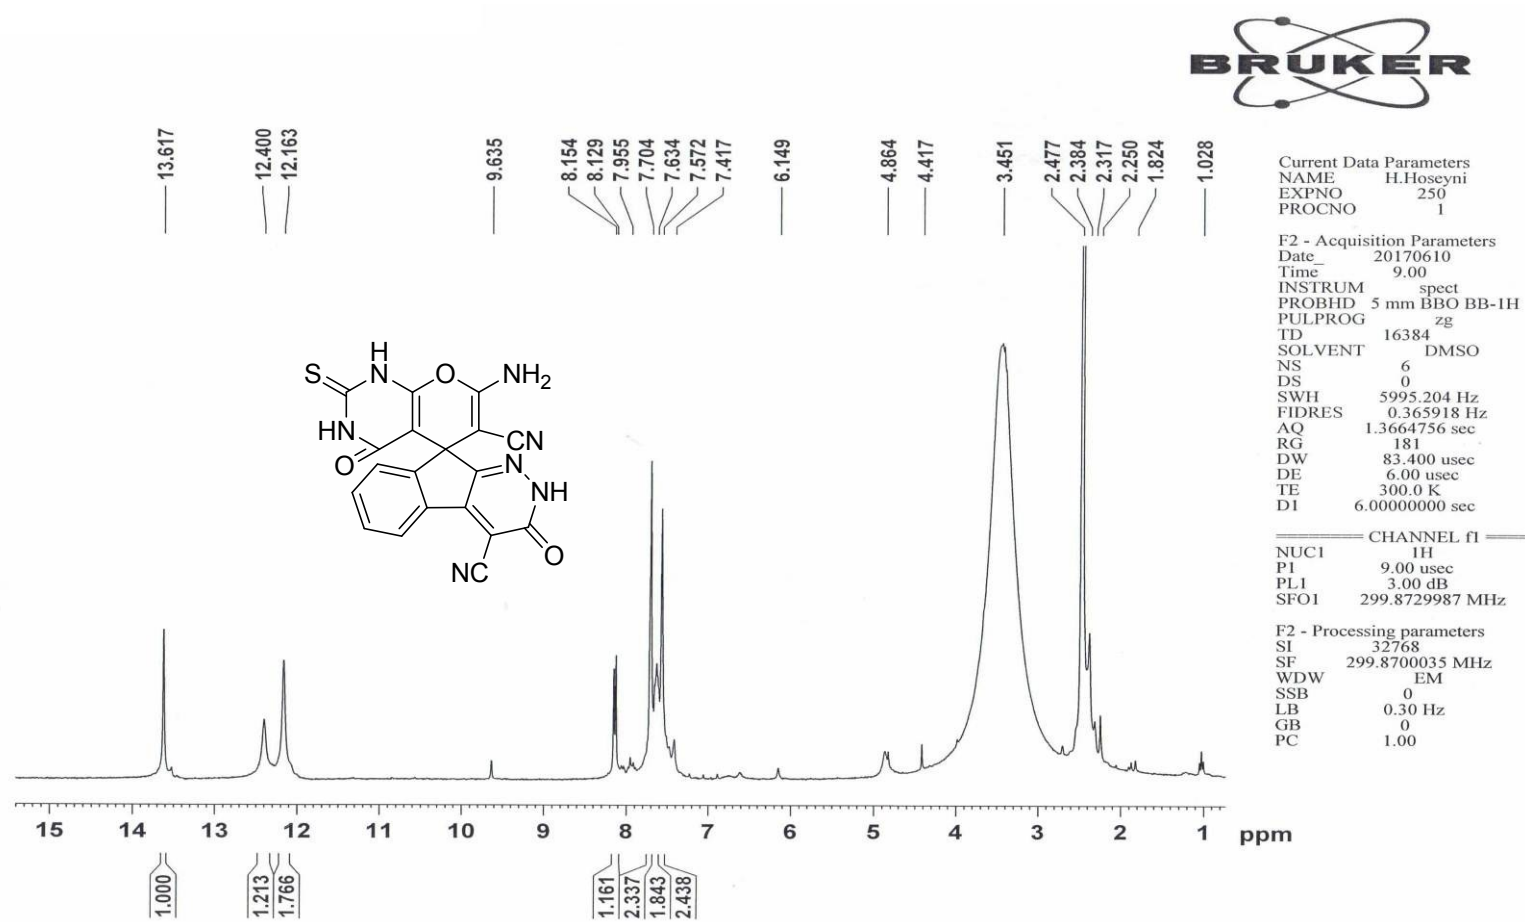 $^1\text{H}$  NMR of 5c

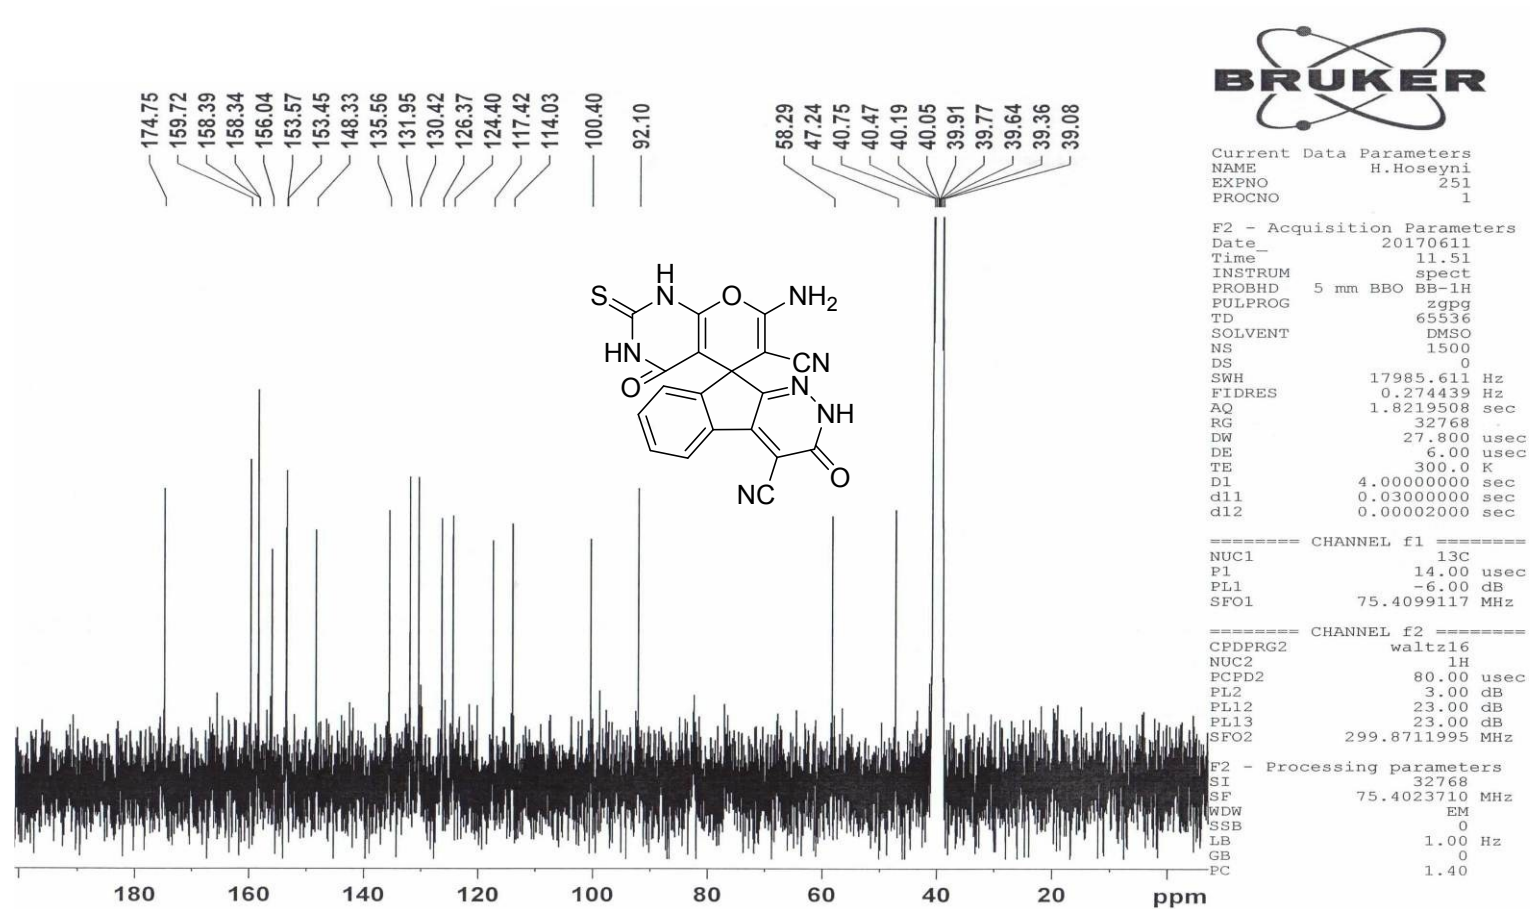

Abundance

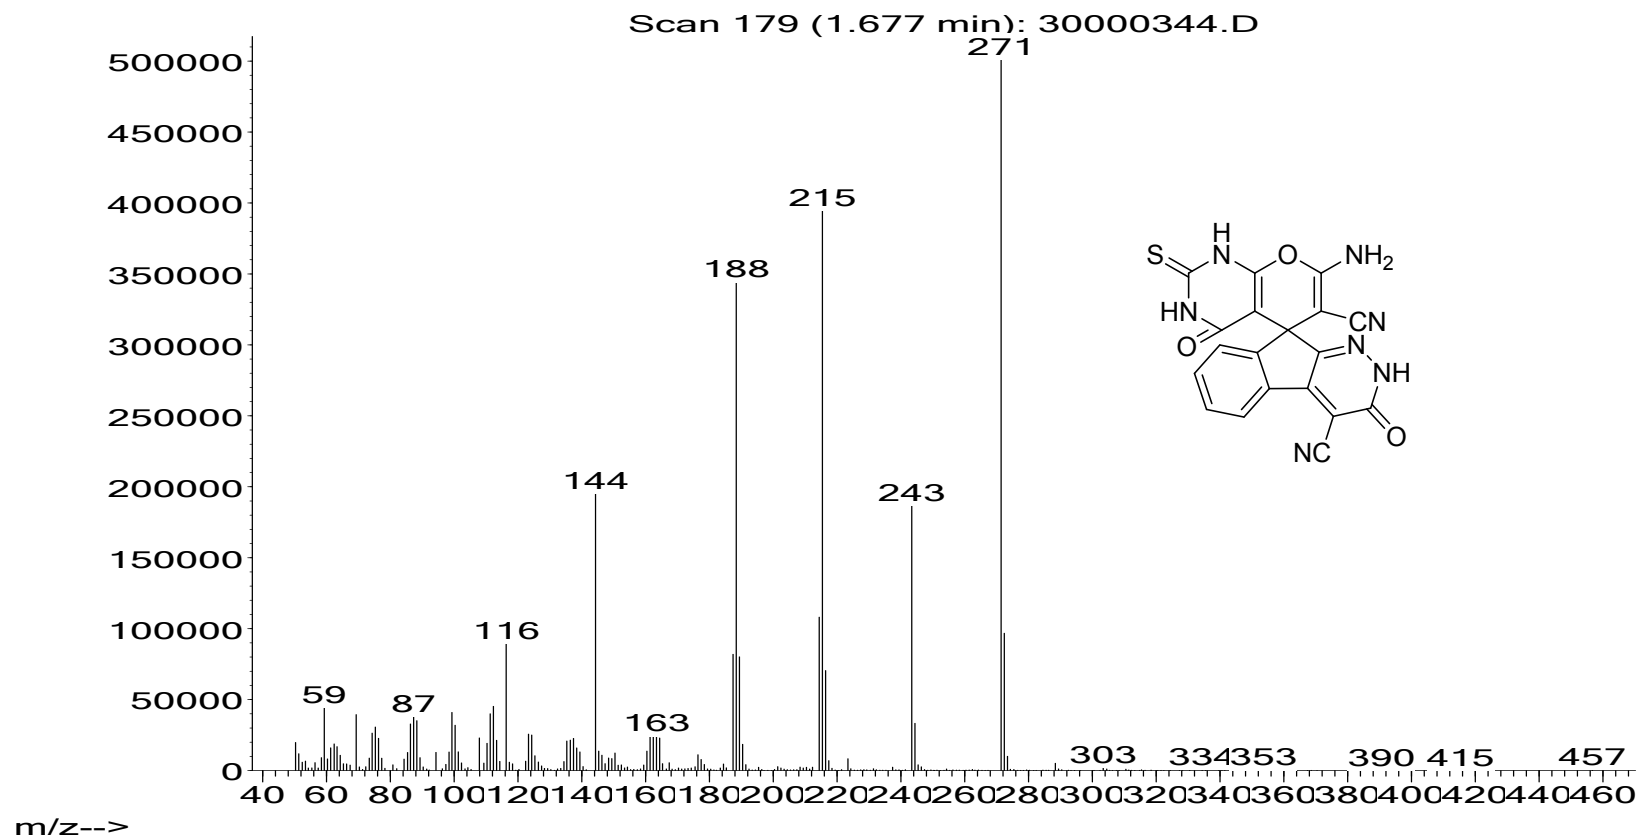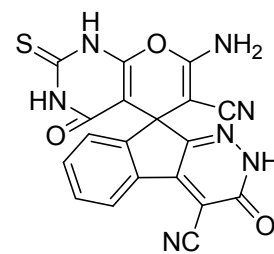

MS of 5c

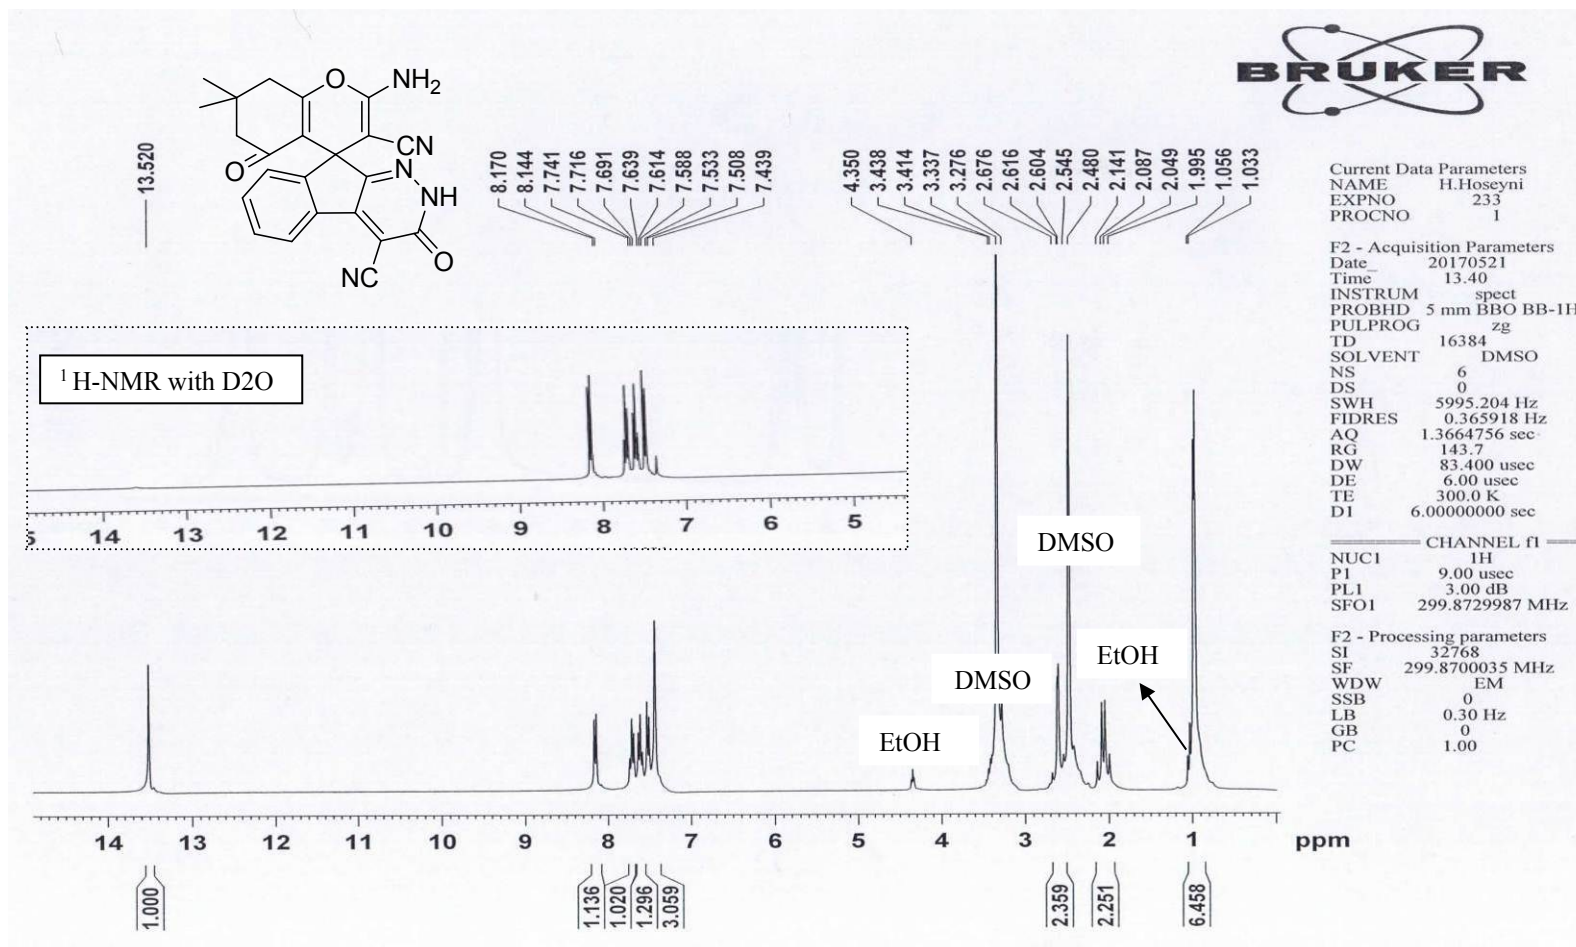

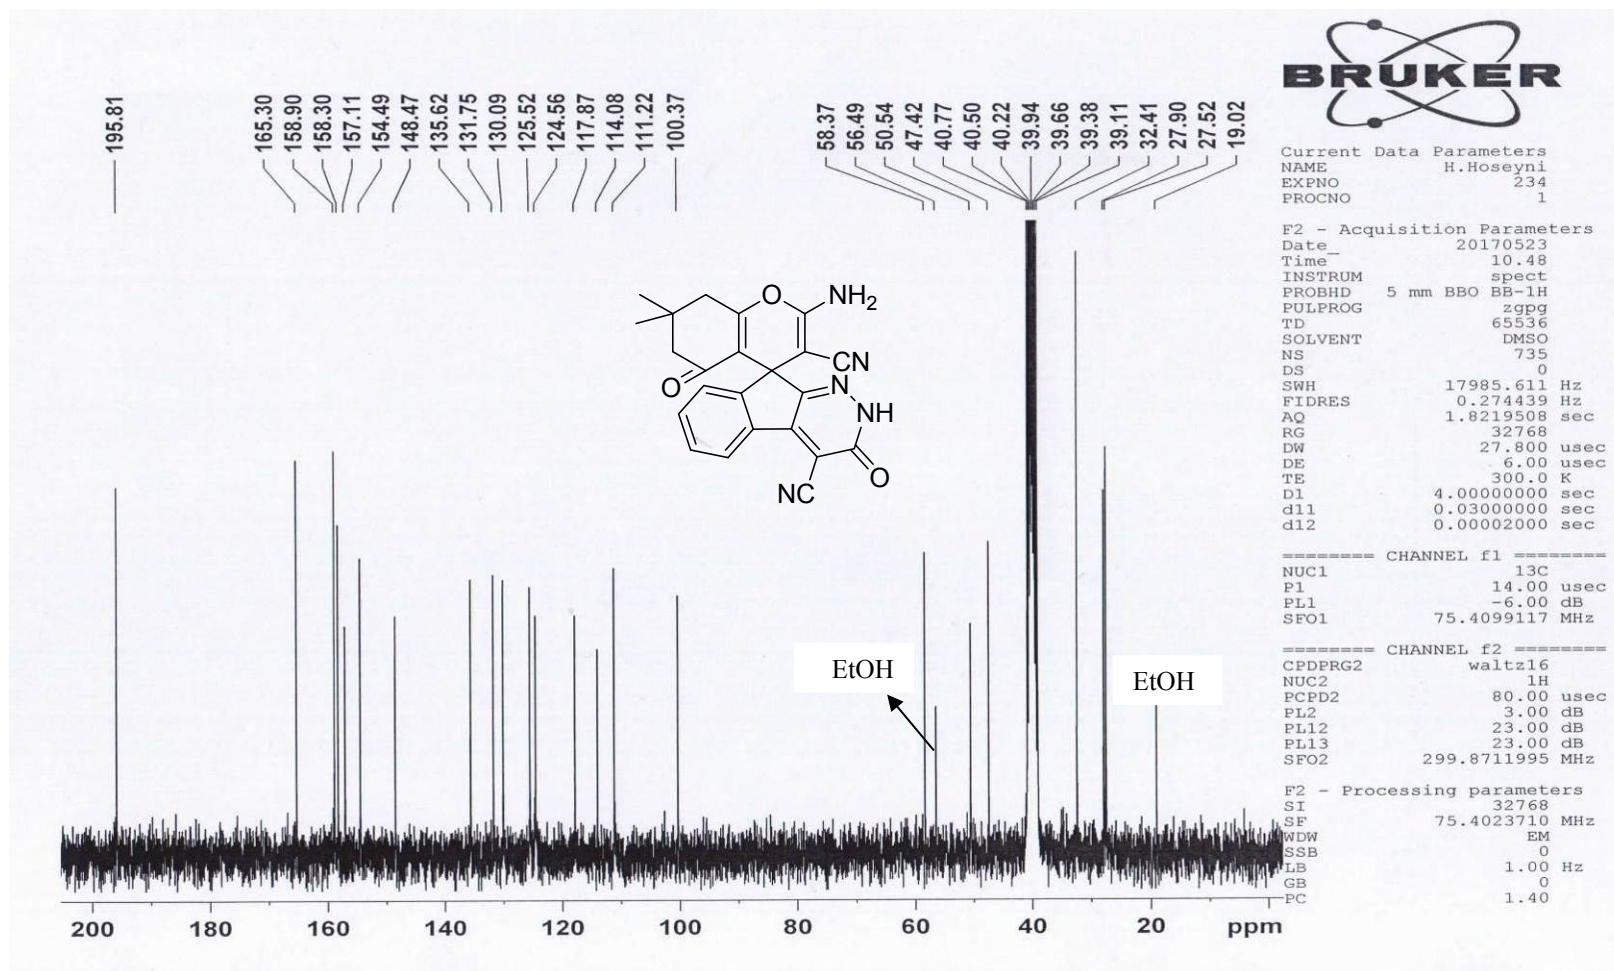

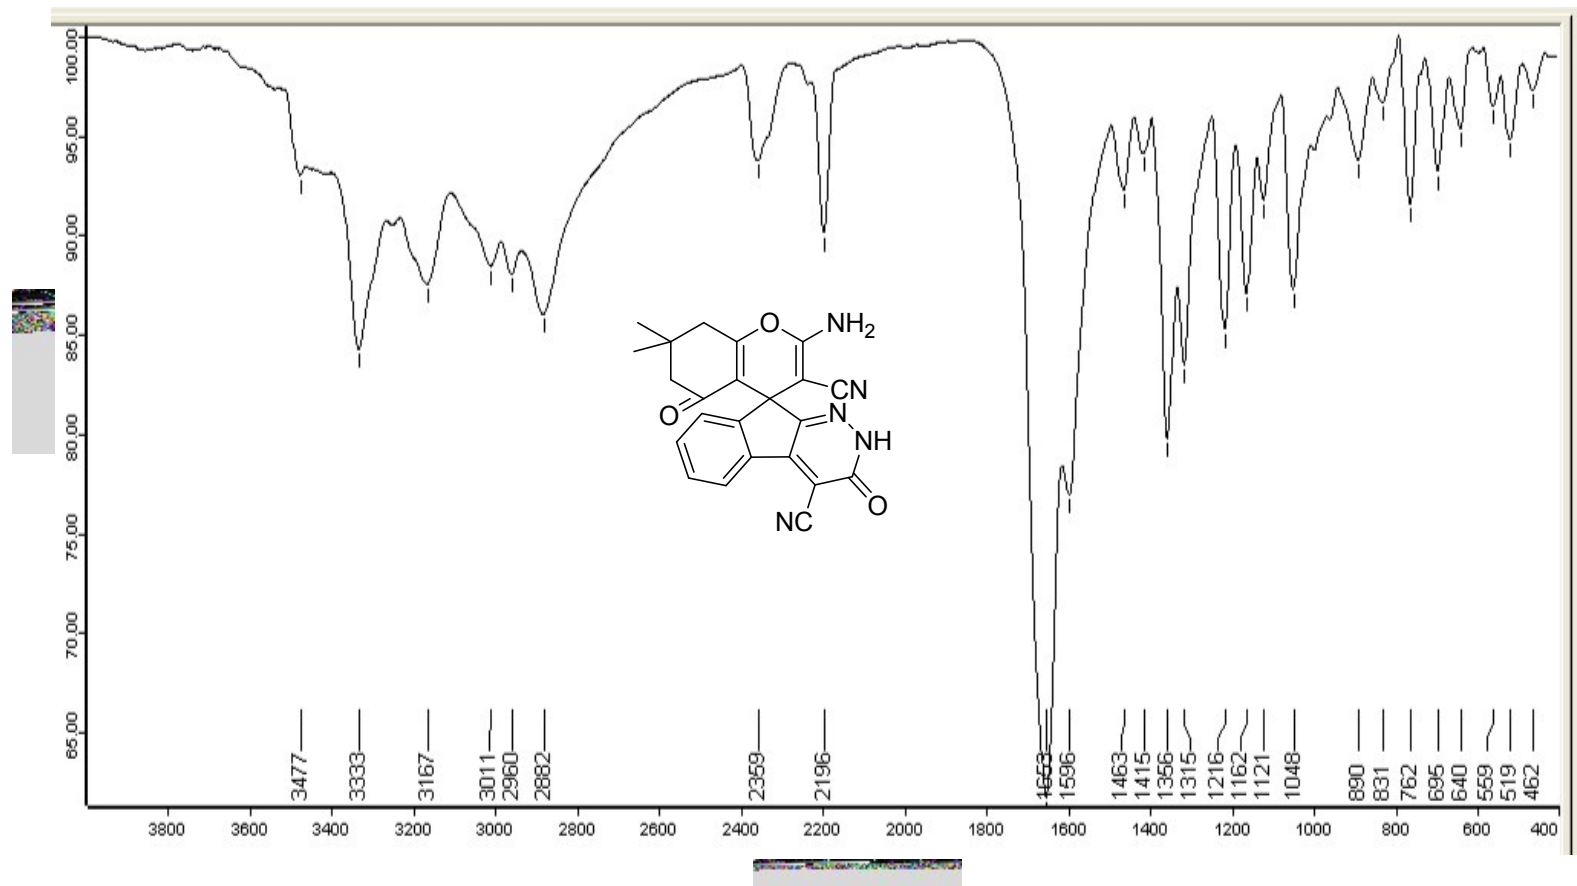

IR of 5d



Abundance

Scan 384 (2.374 min): 30000043.D

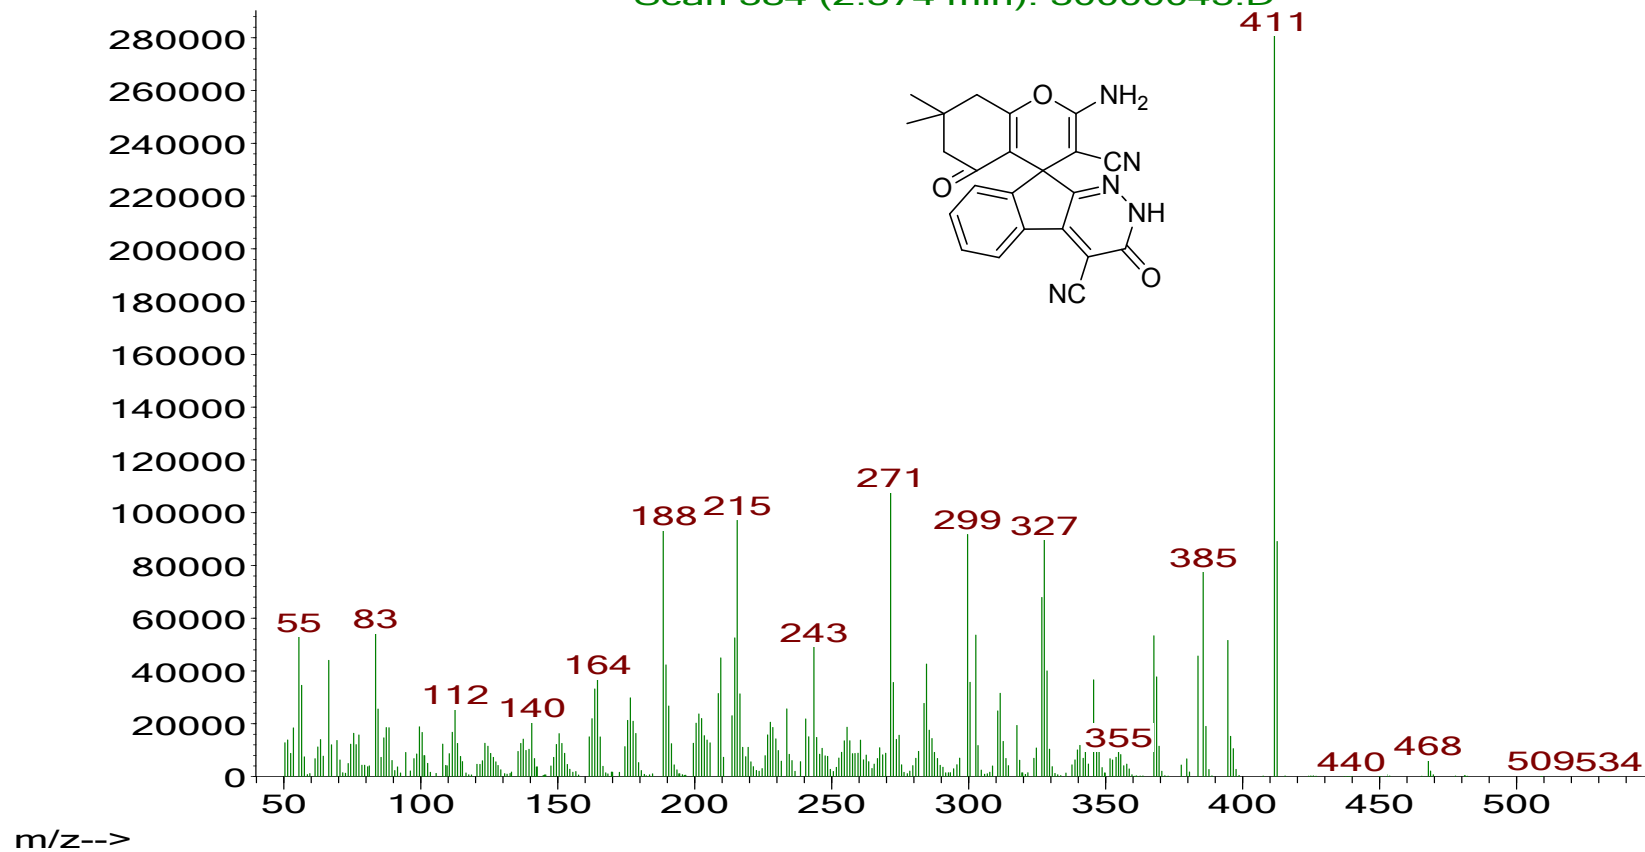

MS of 5d

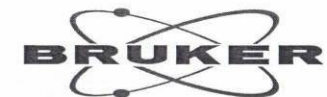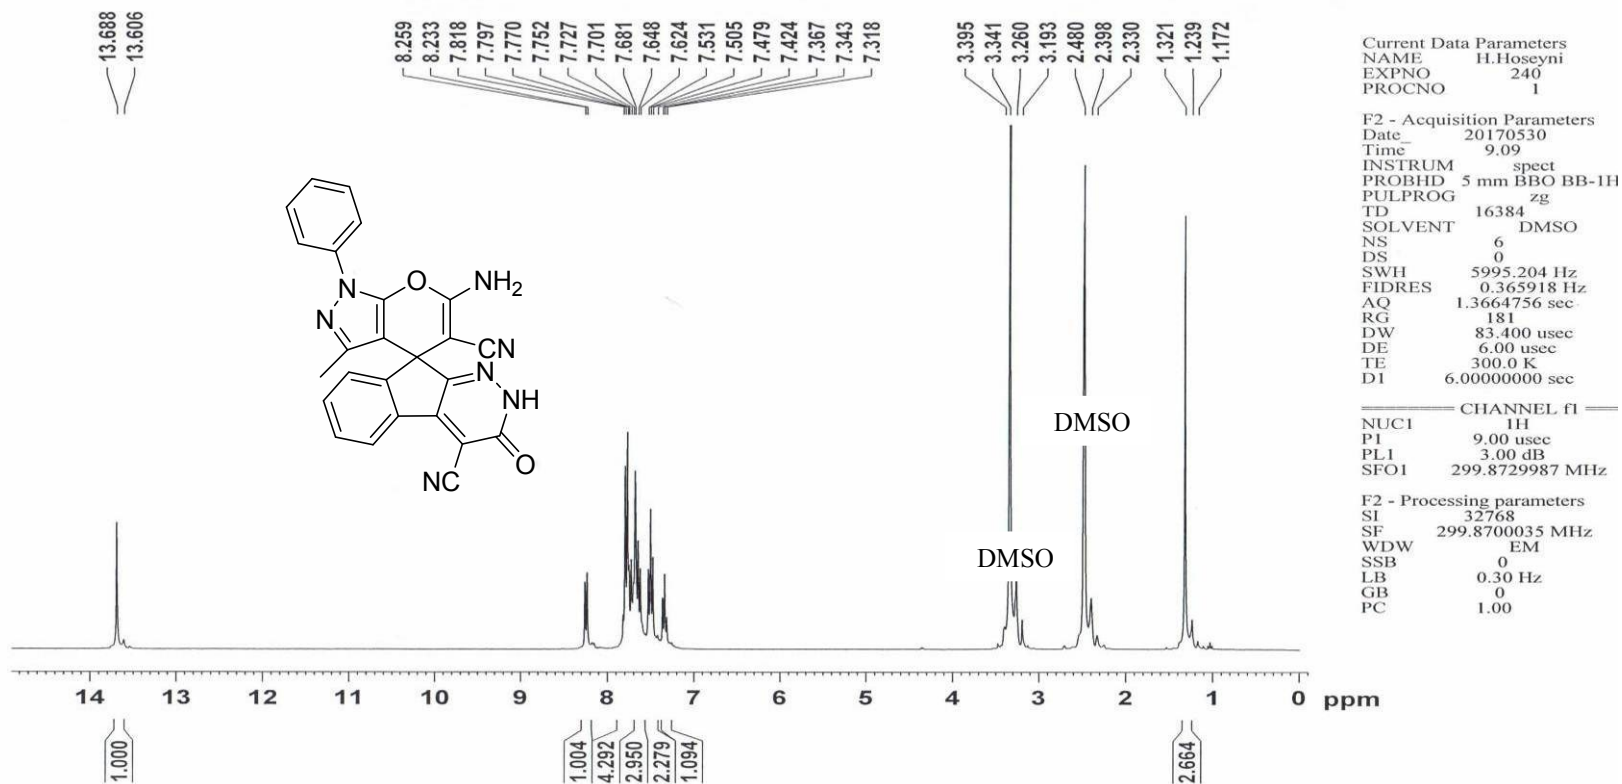

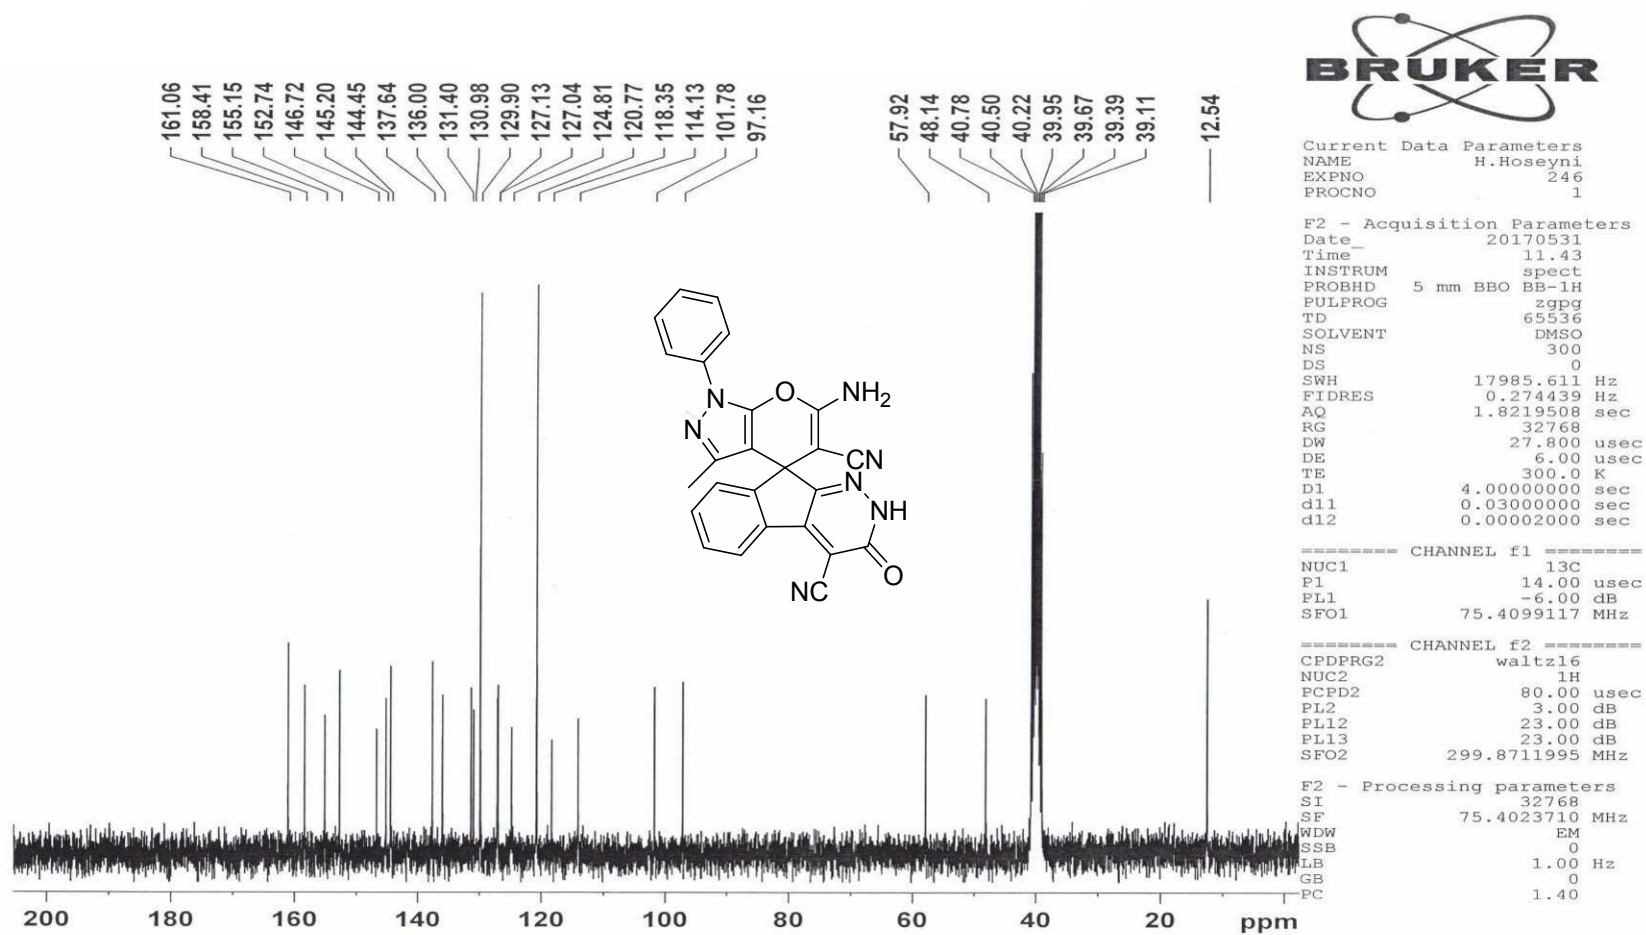<sup>13</sup>C NMR of 5e

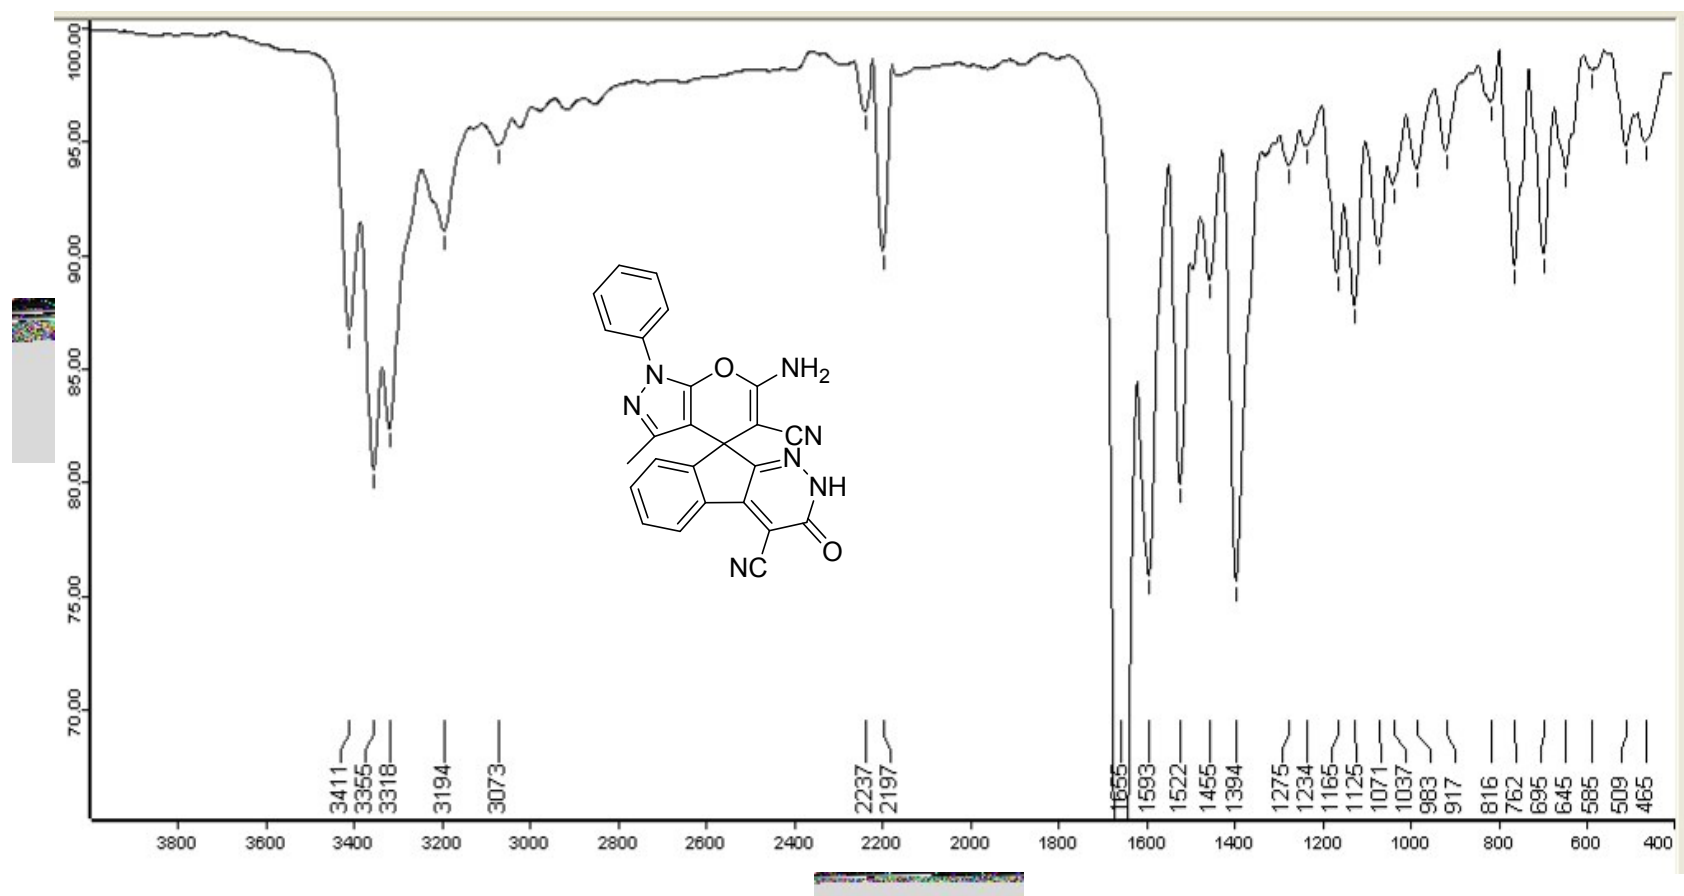

IR of 5e

Abundance

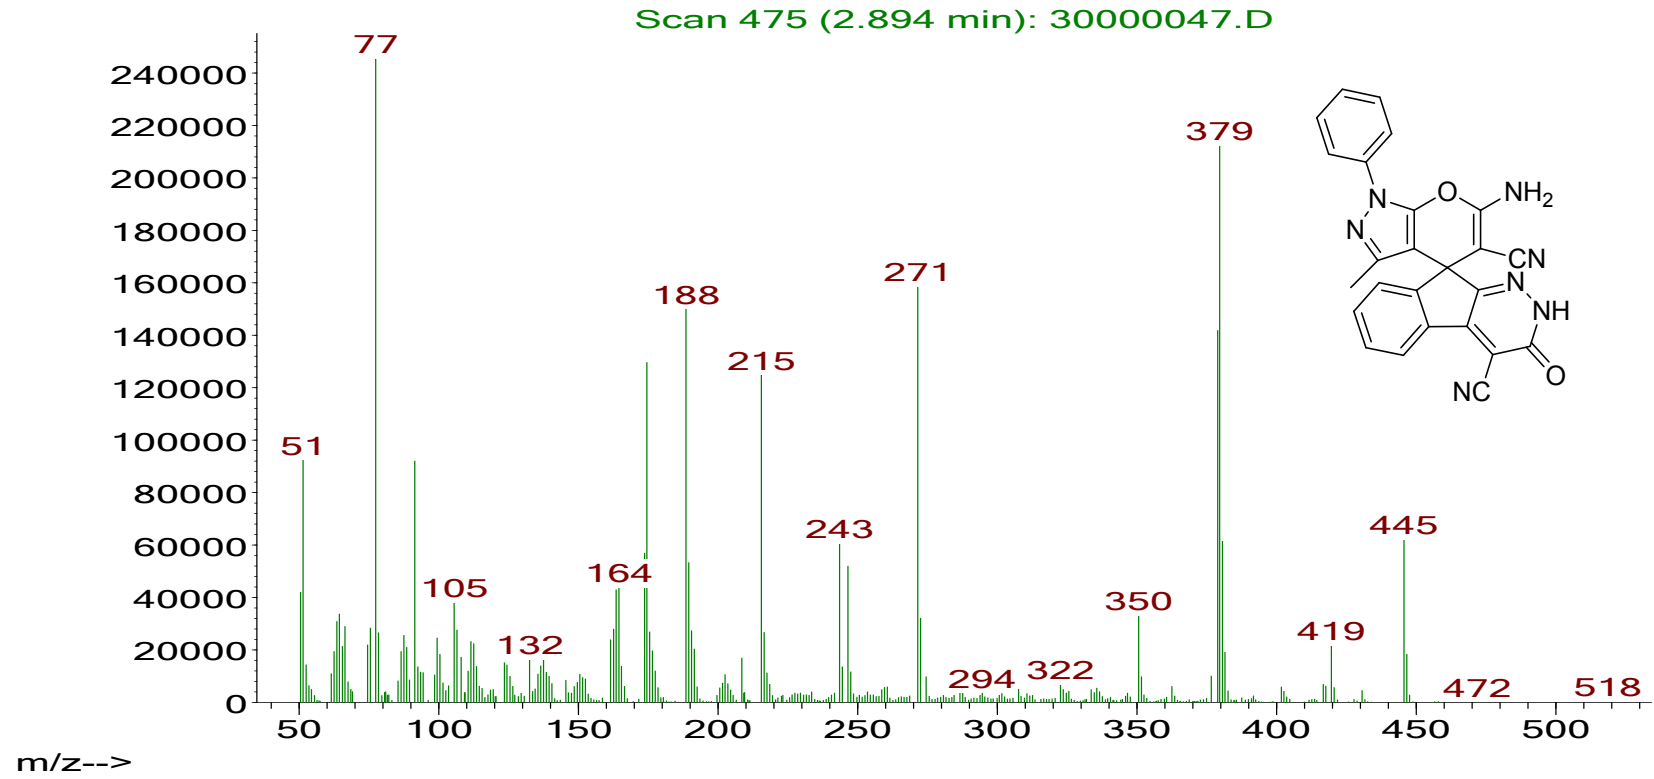

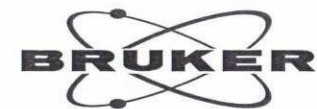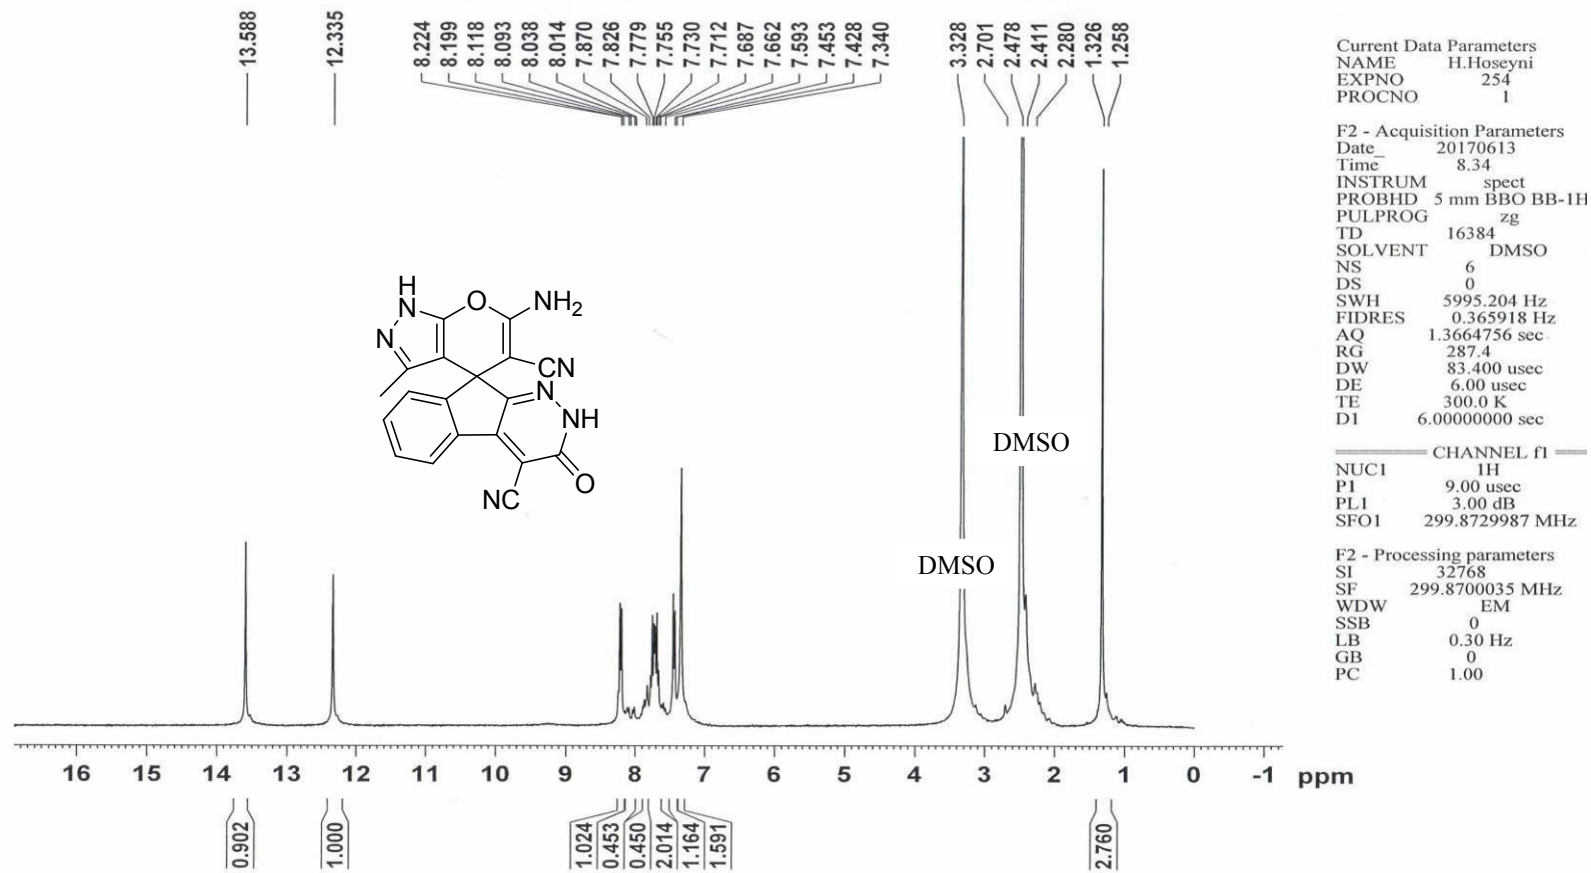

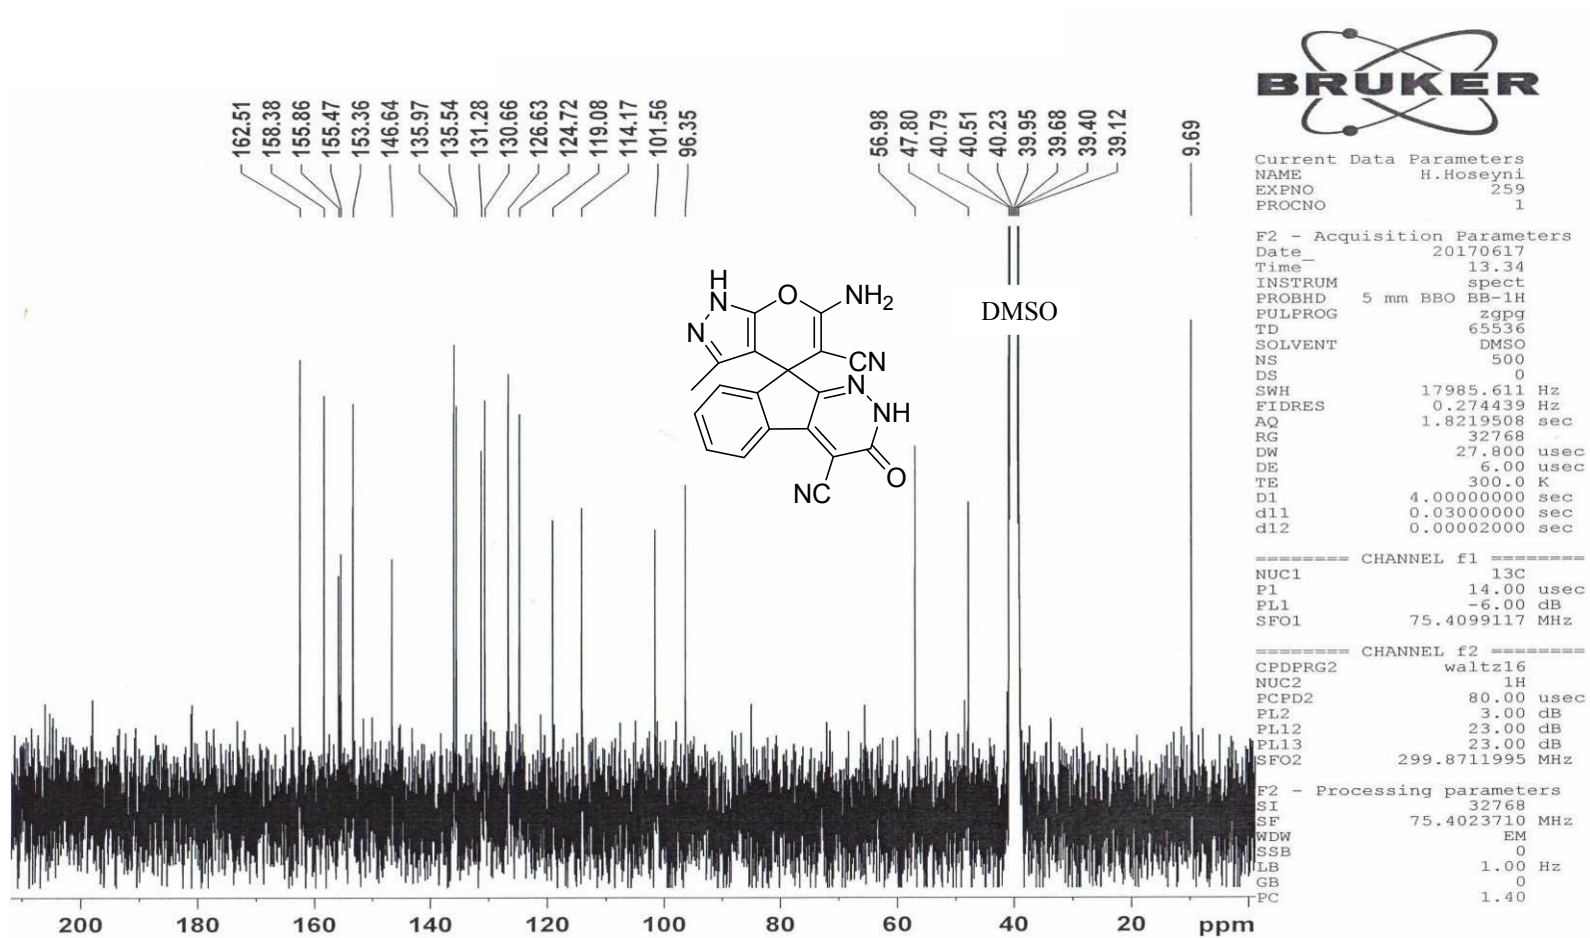**<sup>13</sup>C NMR of 5f**

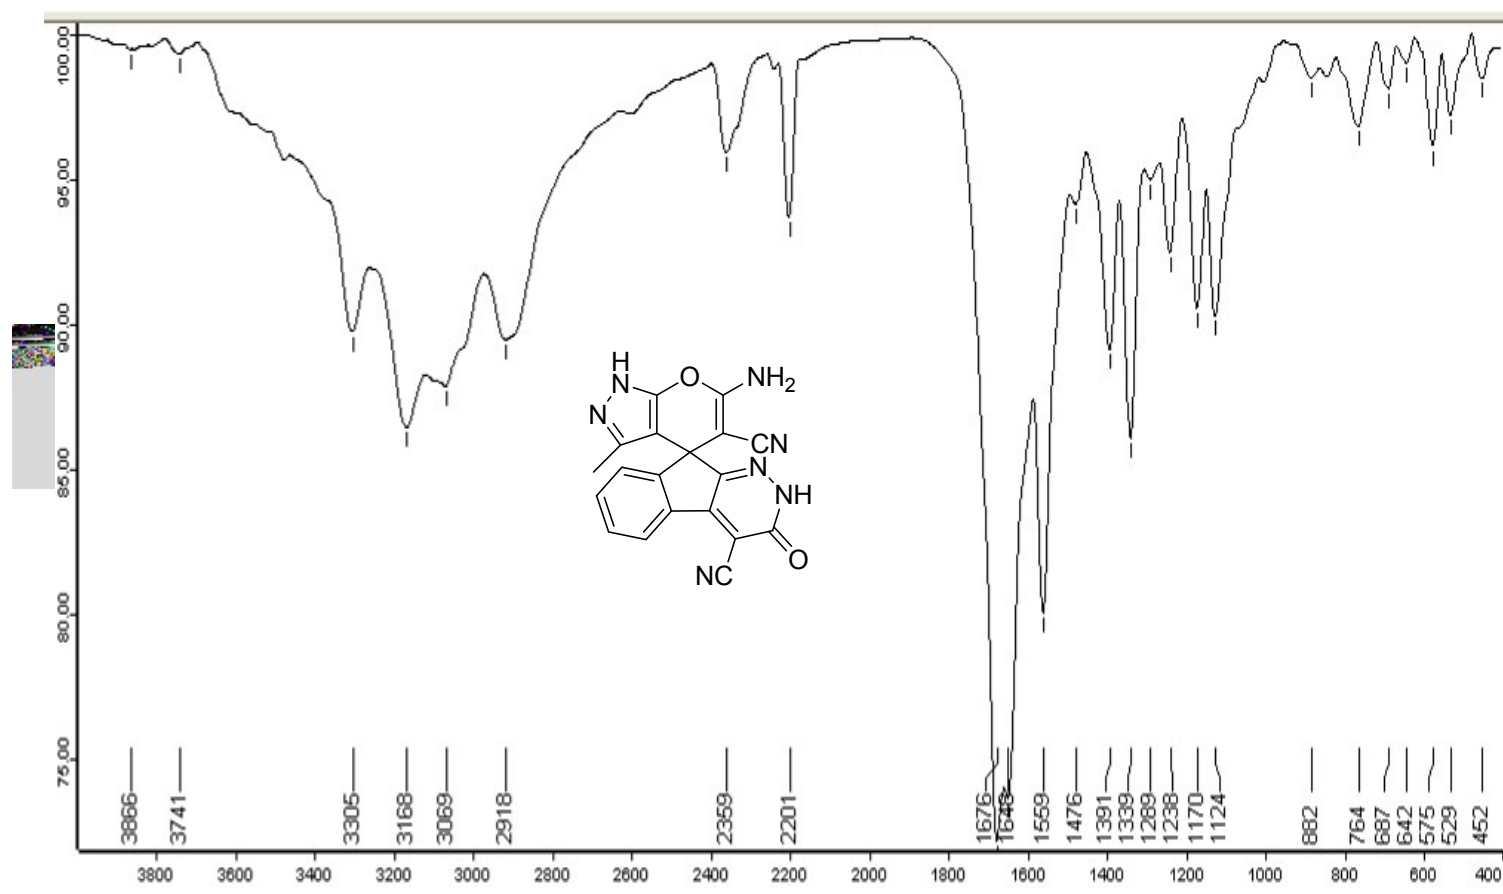

IR of 5f



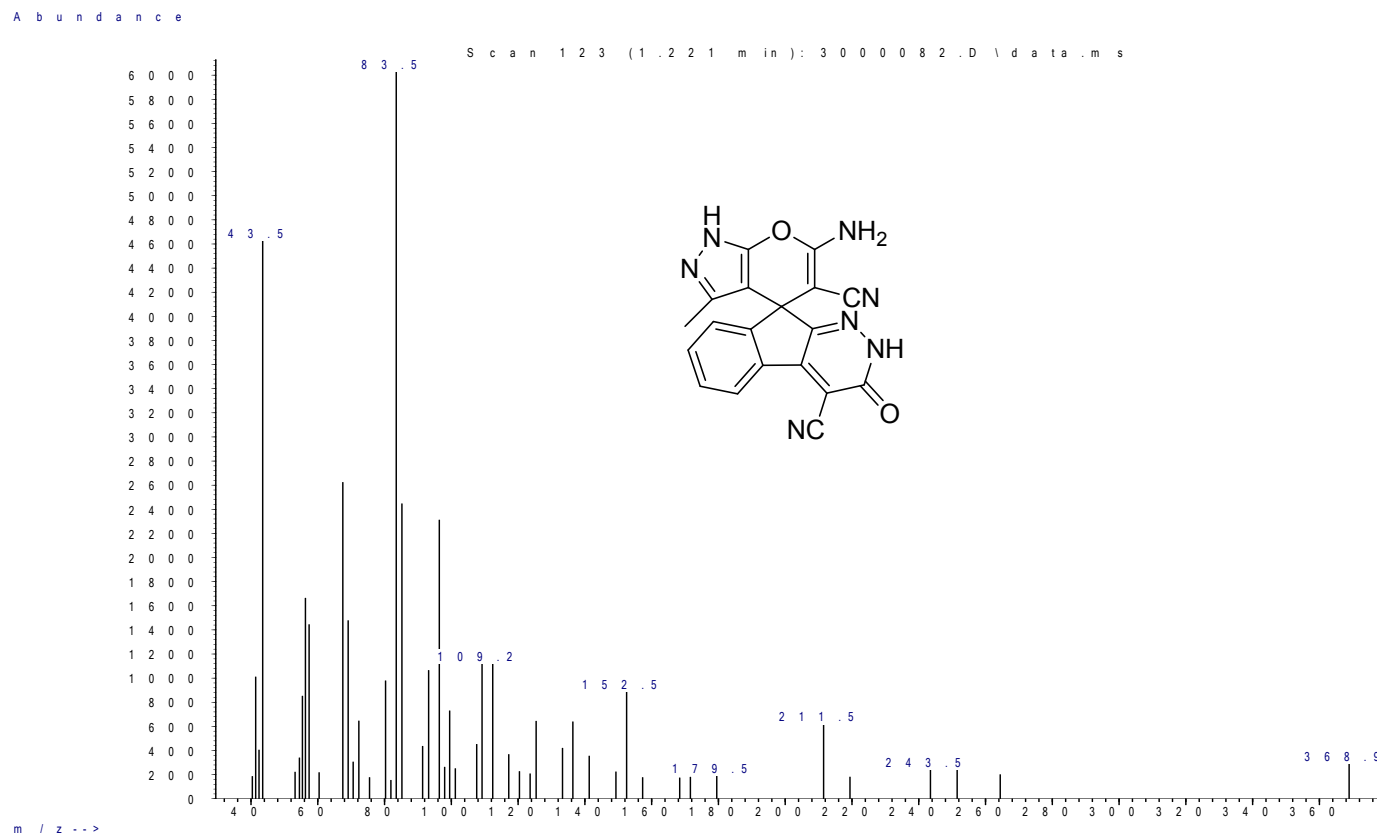

MS of 5f

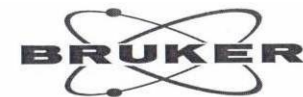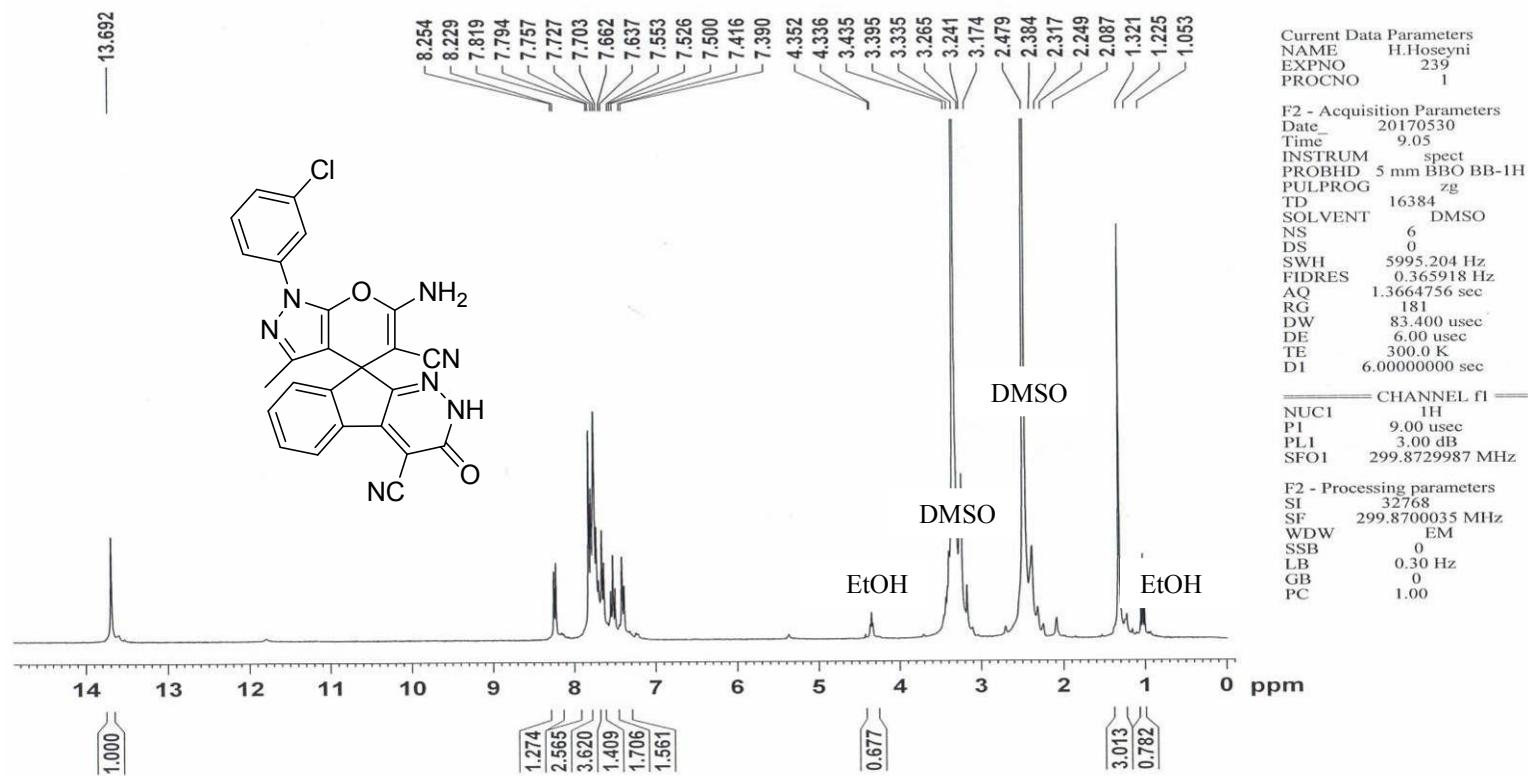

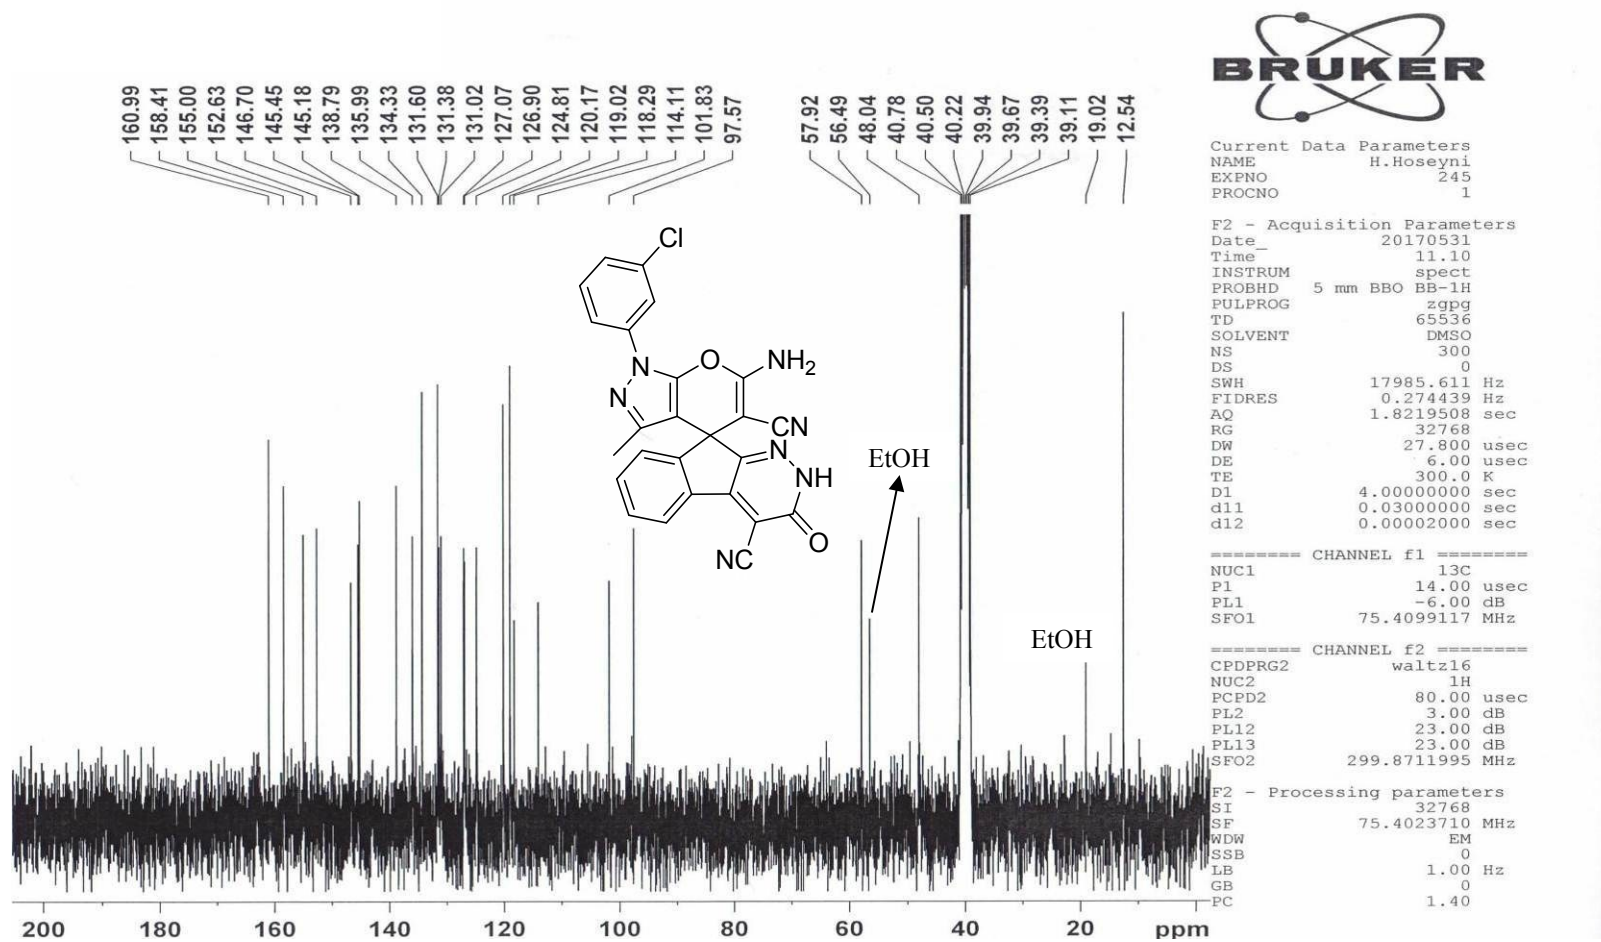

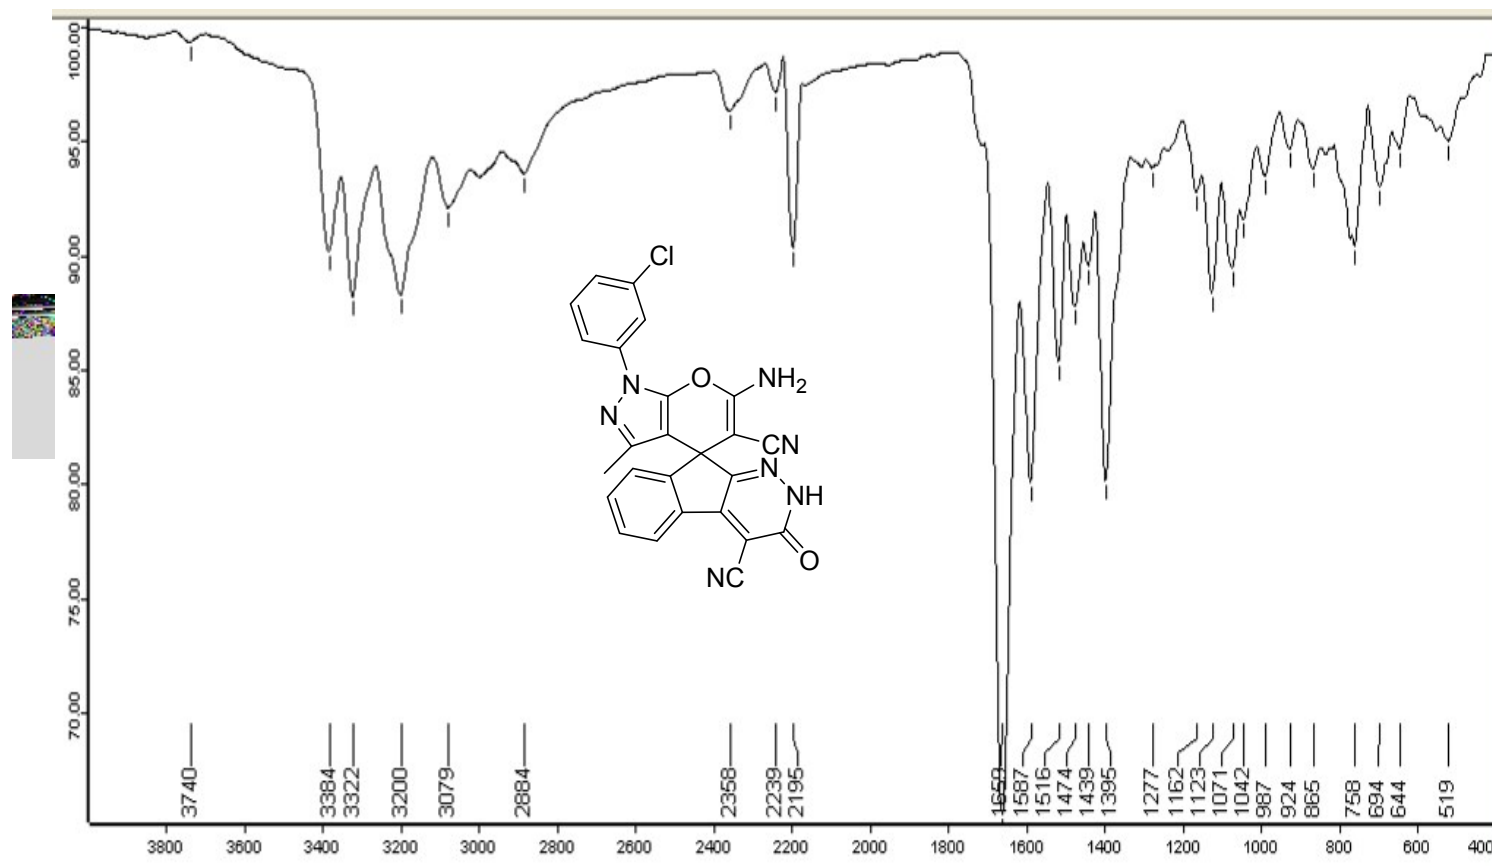

IR of 5g

Abundance

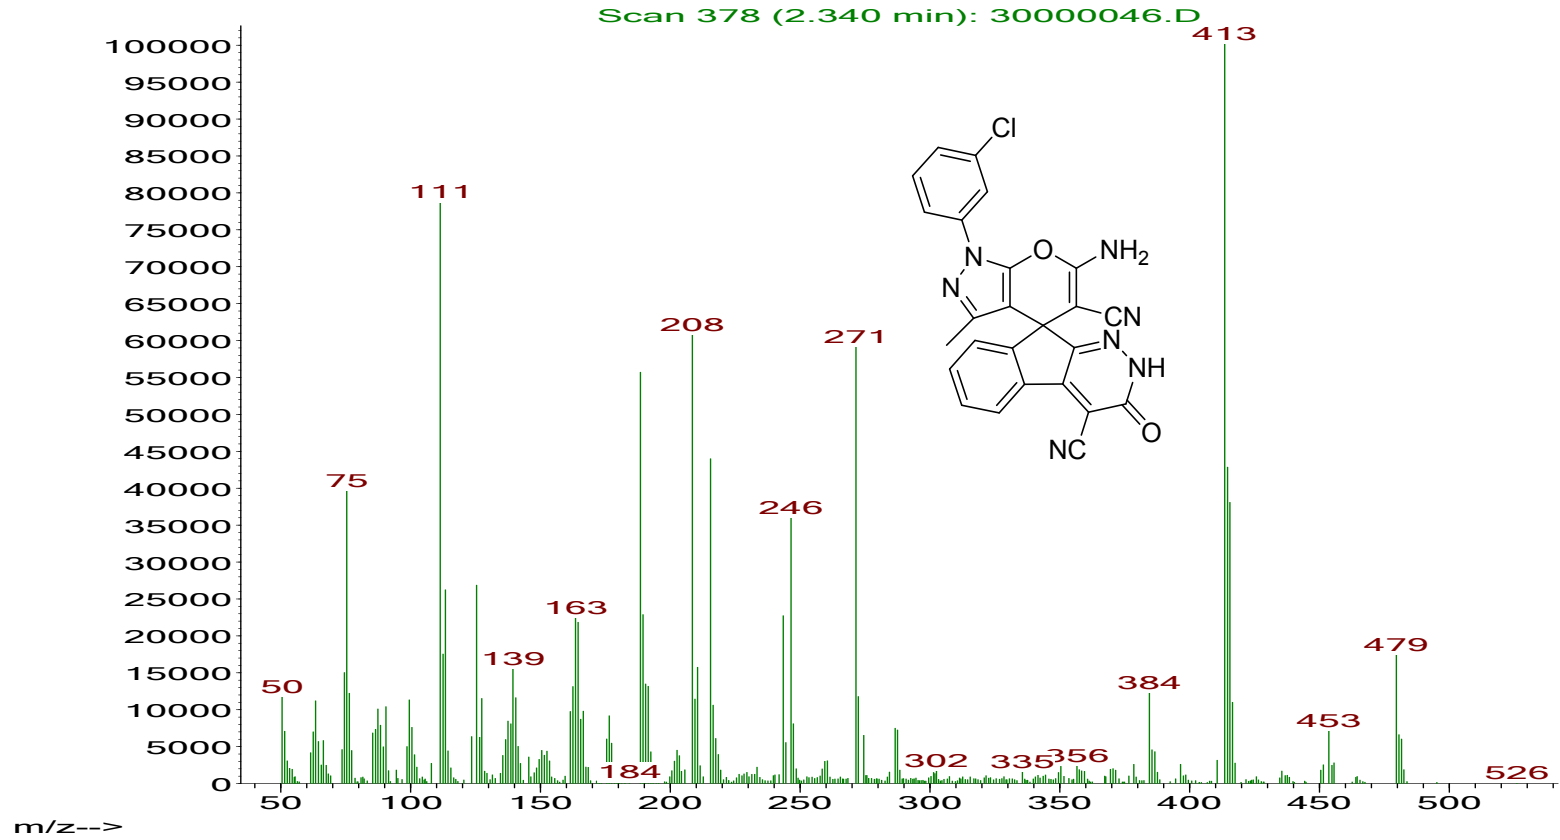

MS of 5g

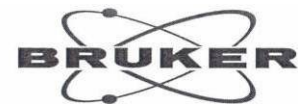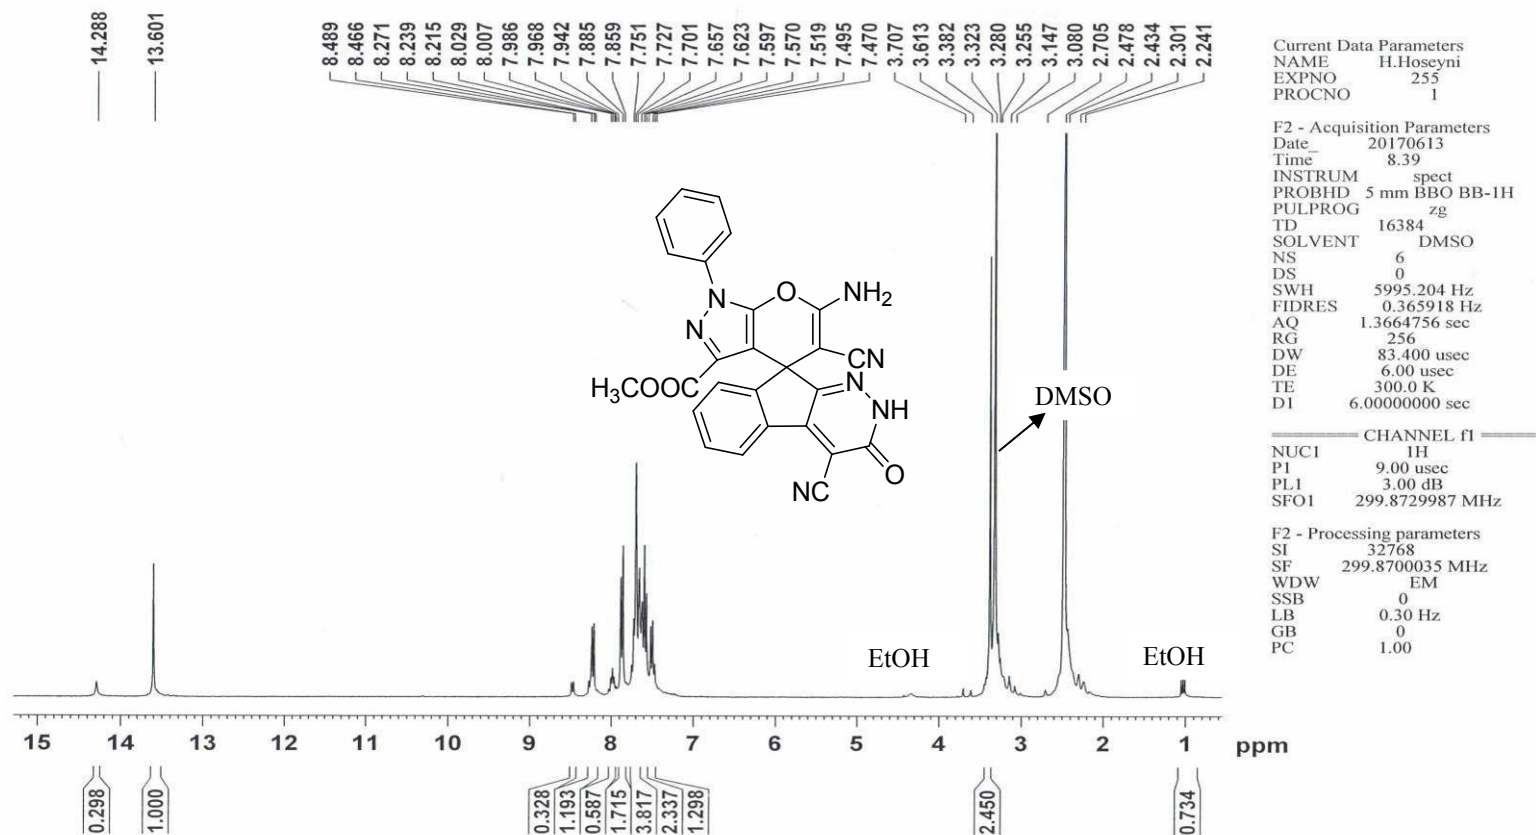

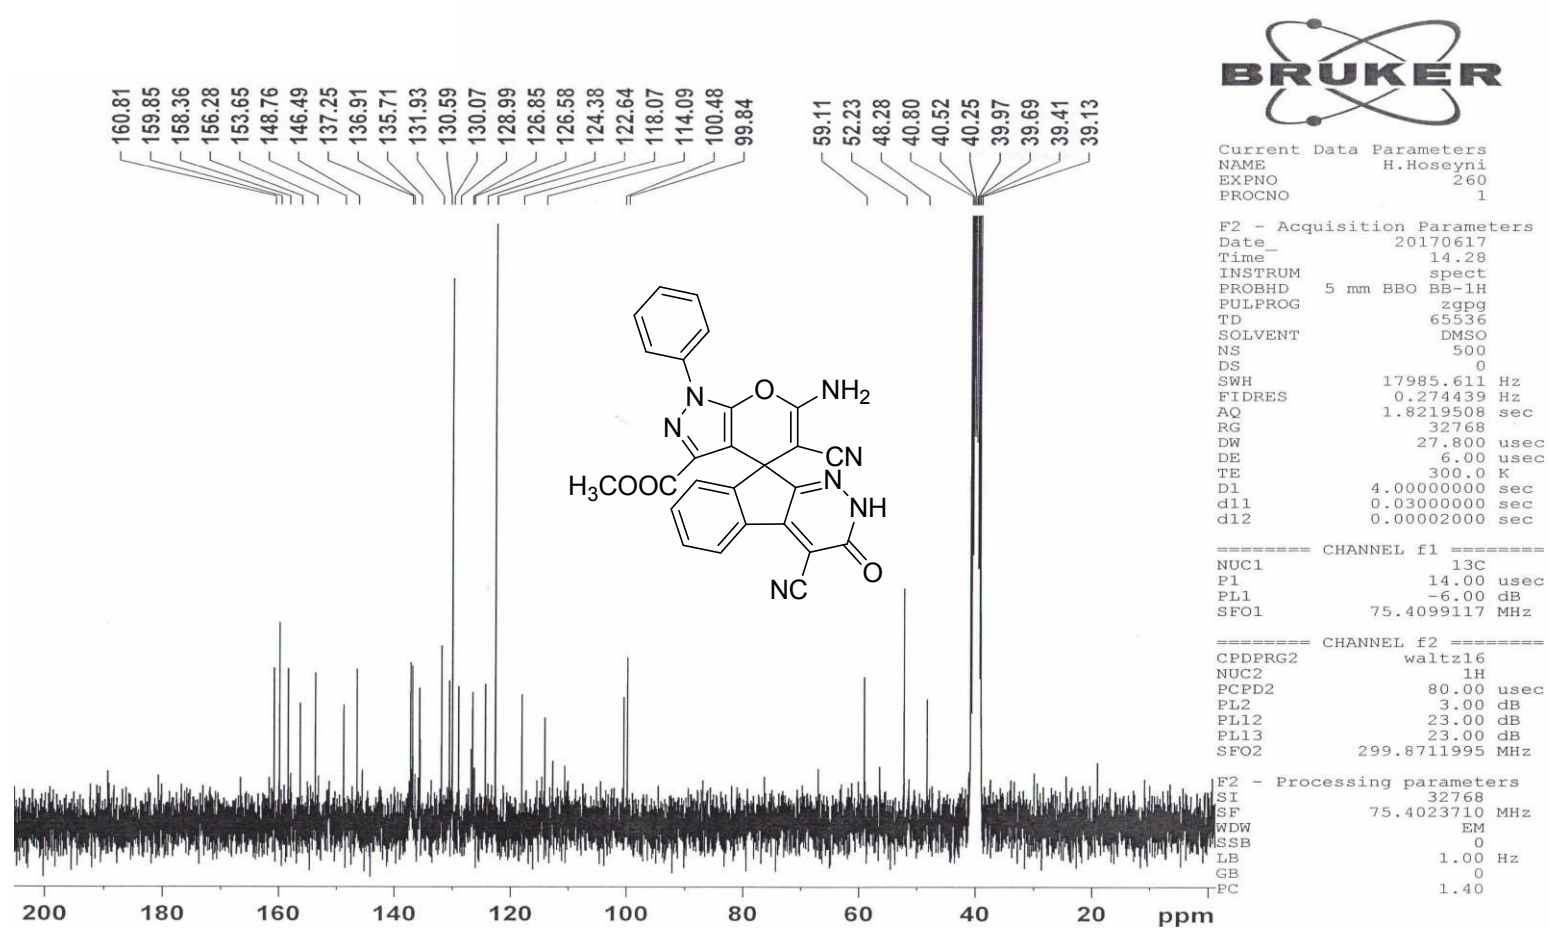

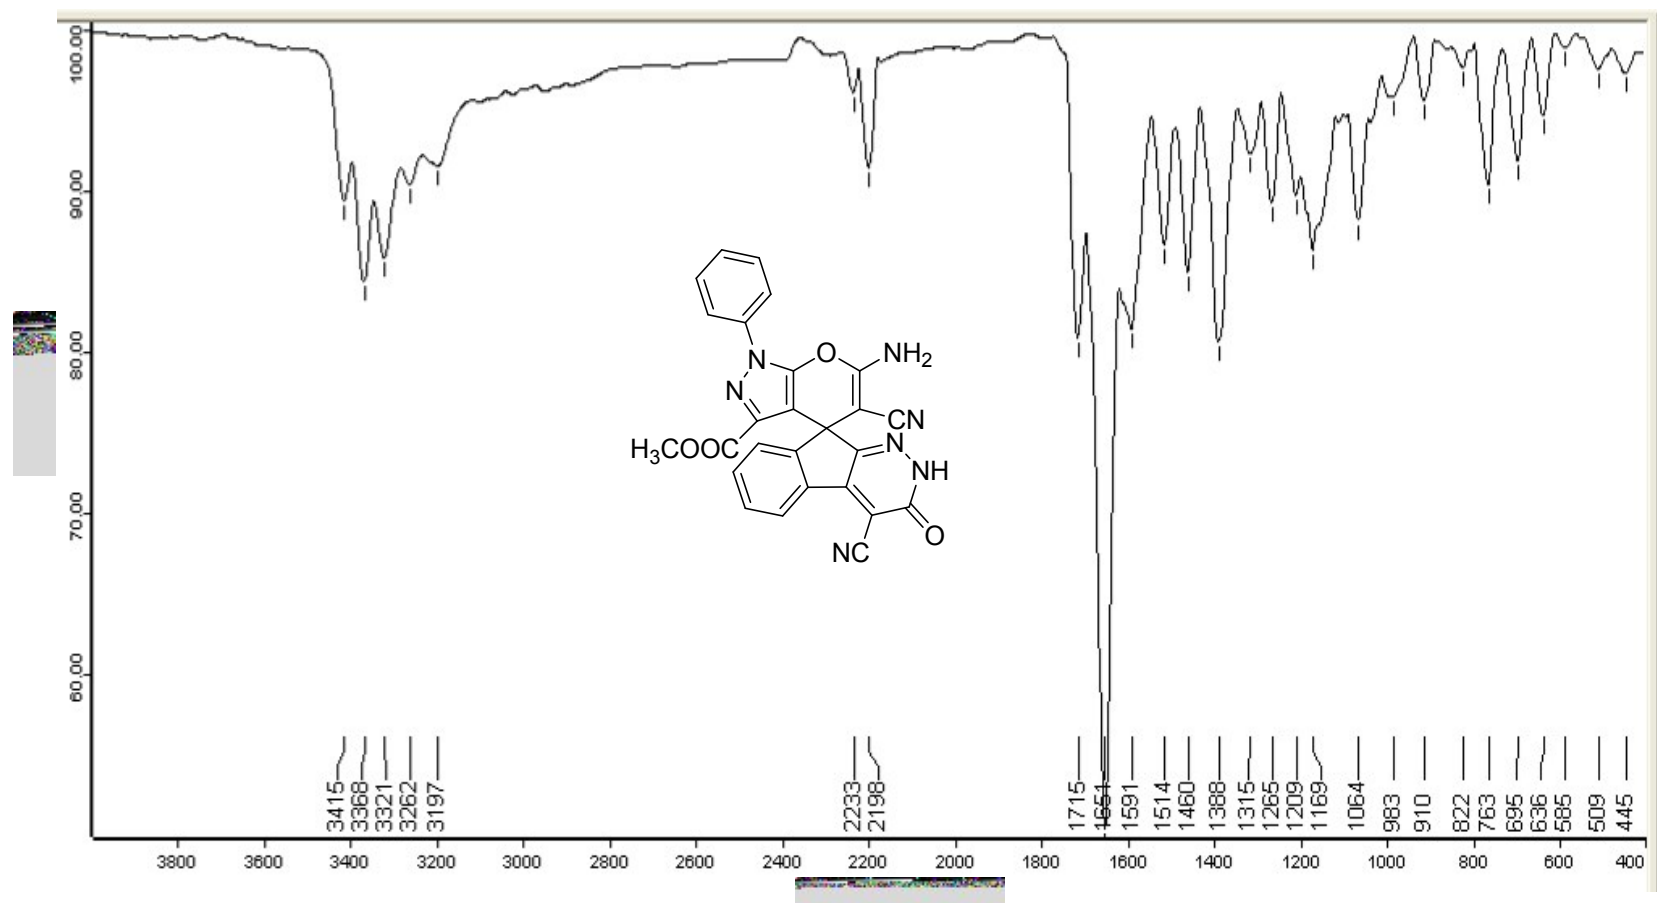

IR of 5h



Abundance

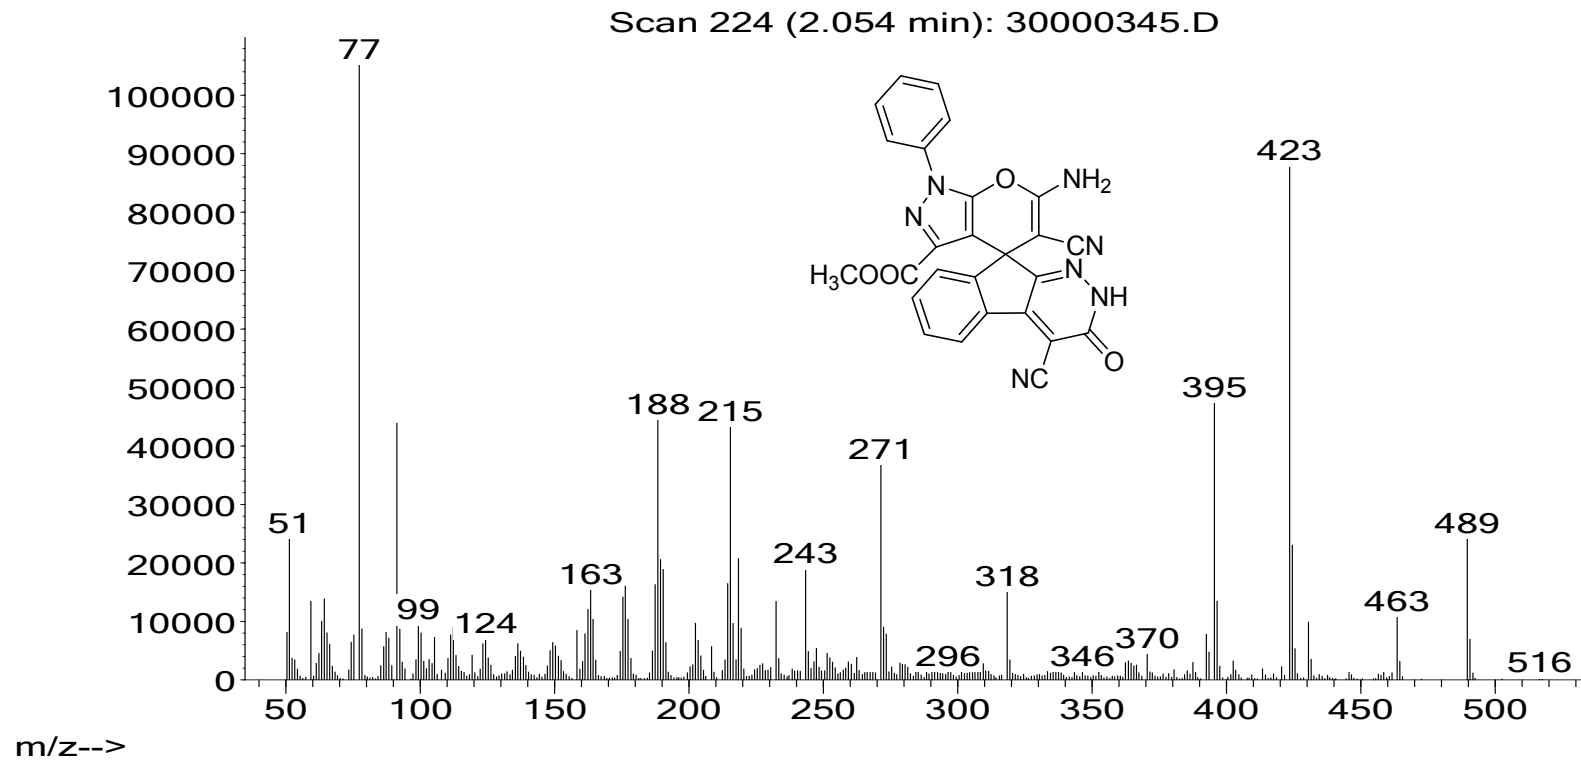

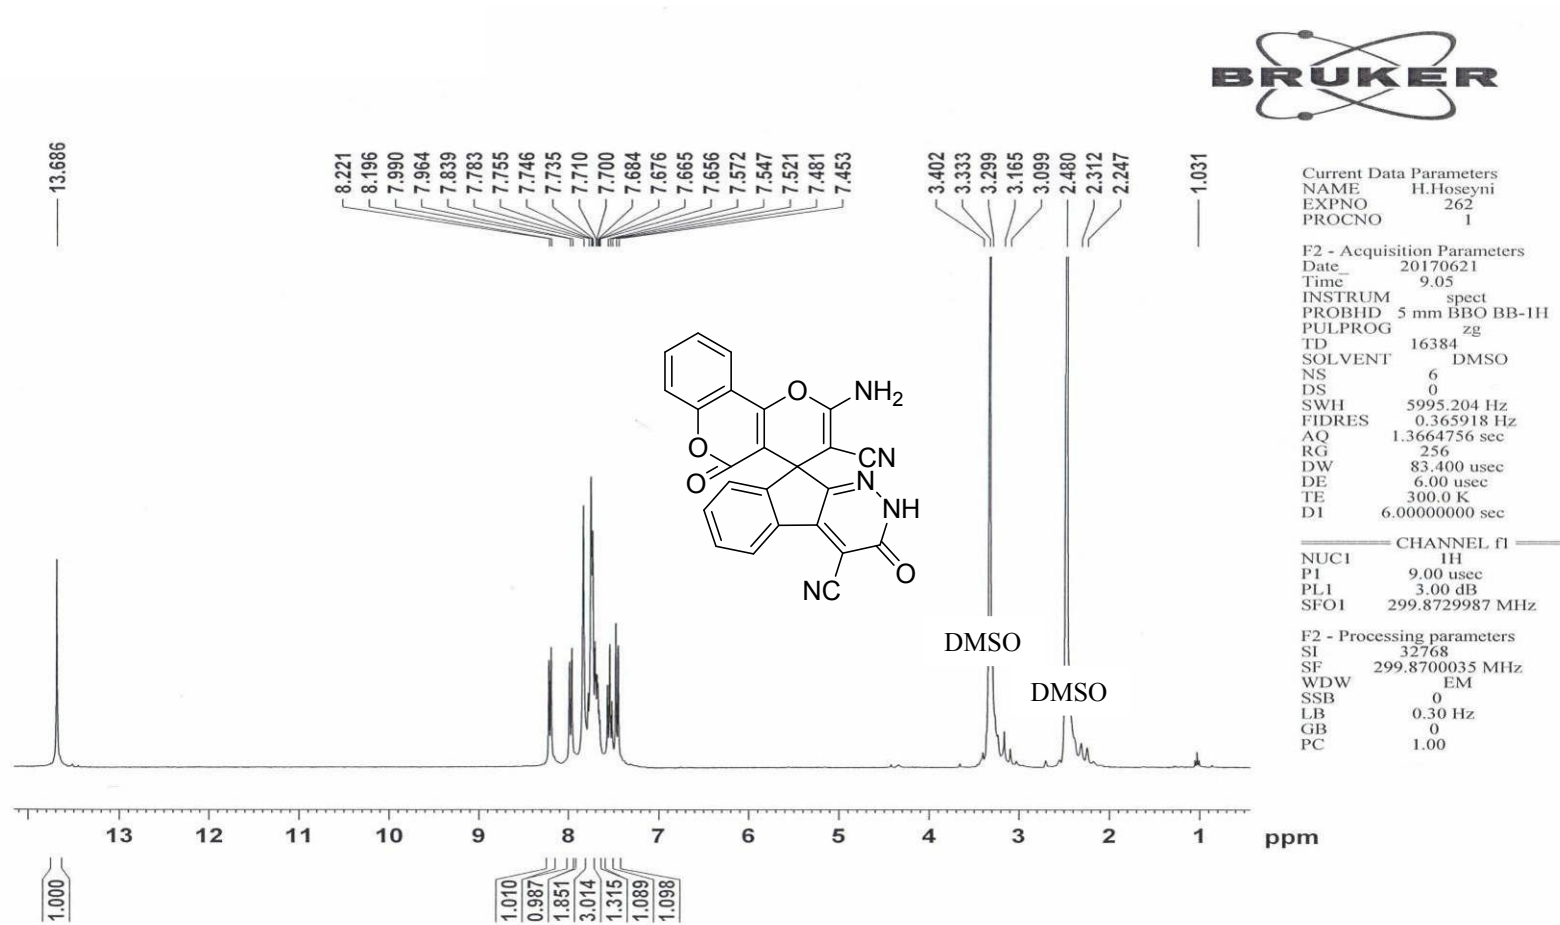 $^1\text{H}$  NMR of 5i

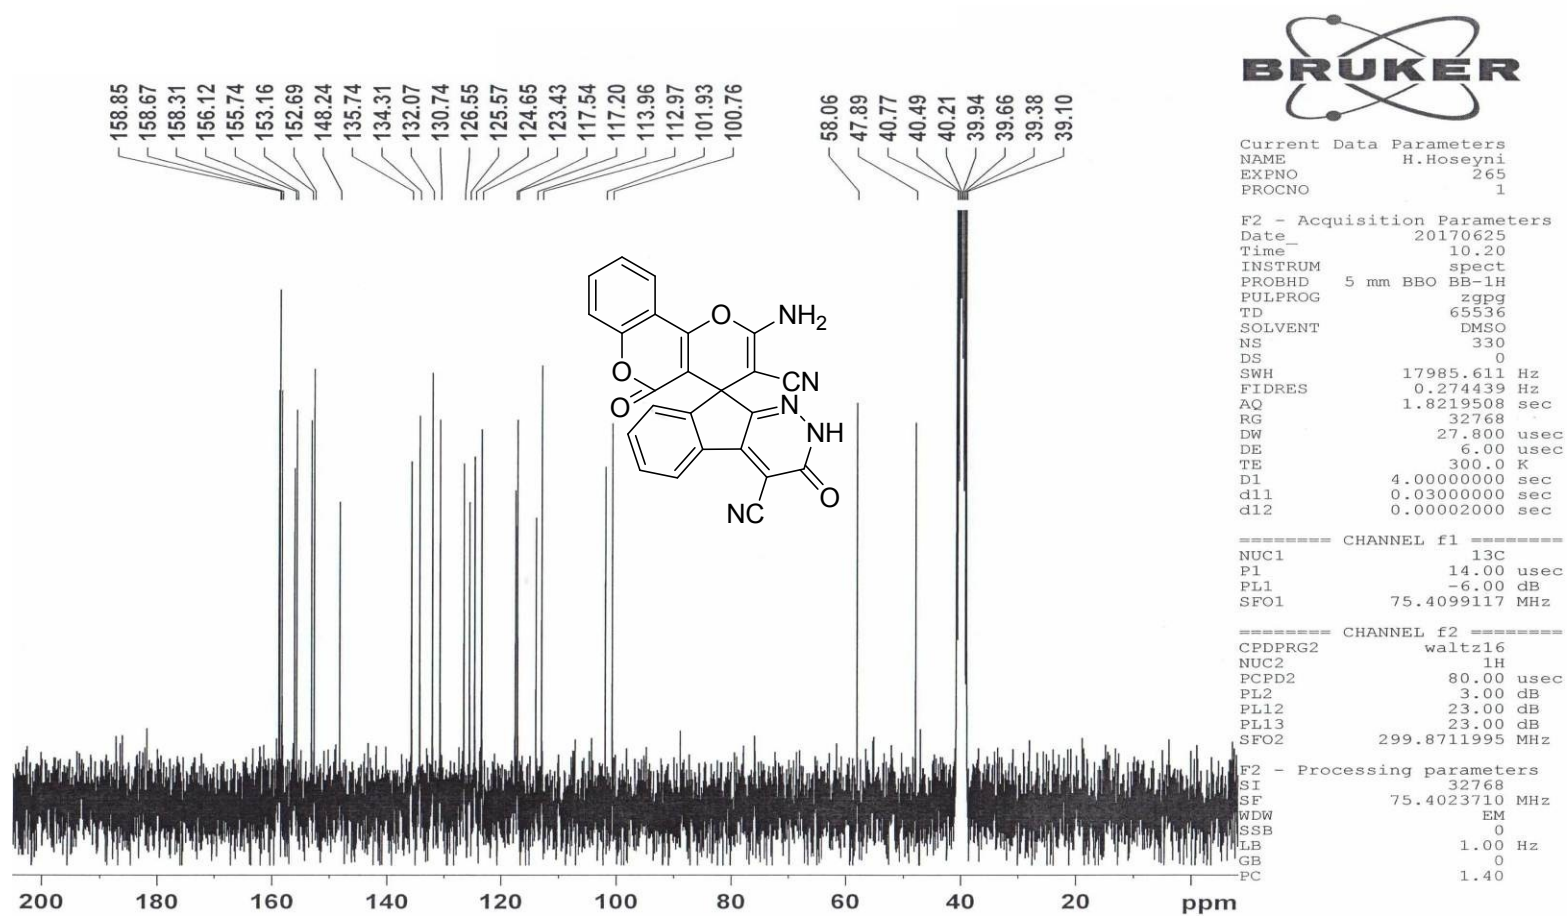**<sup>13</sup>C NMR of 5i**

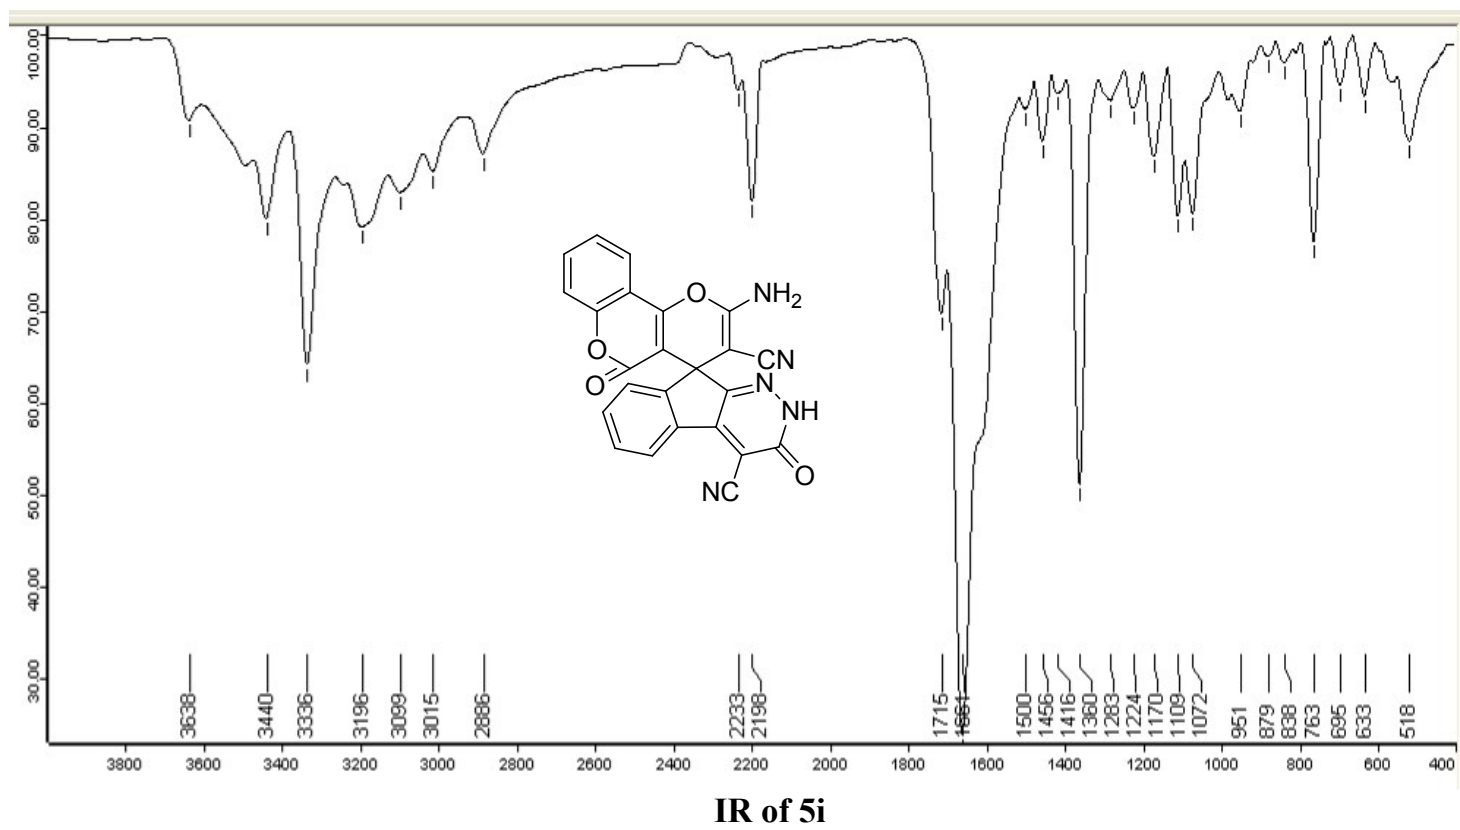

Abundance

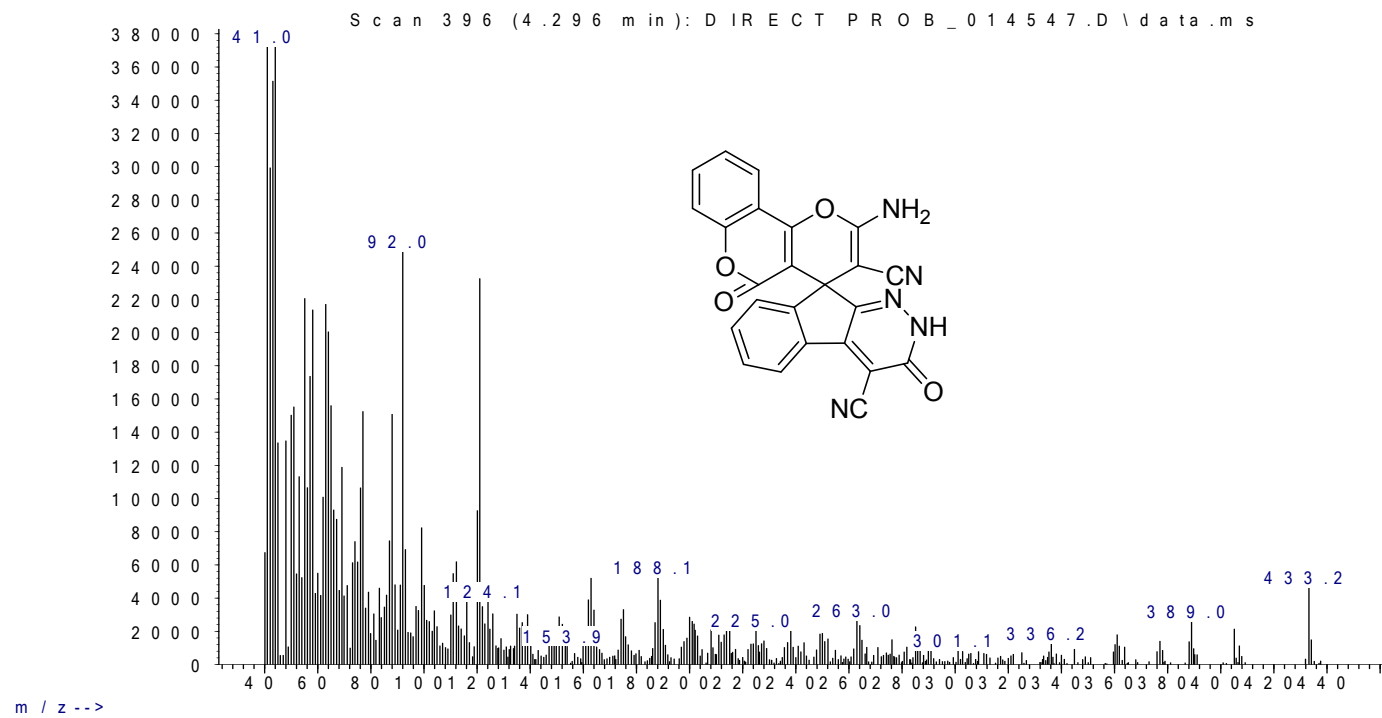

MS of 5i

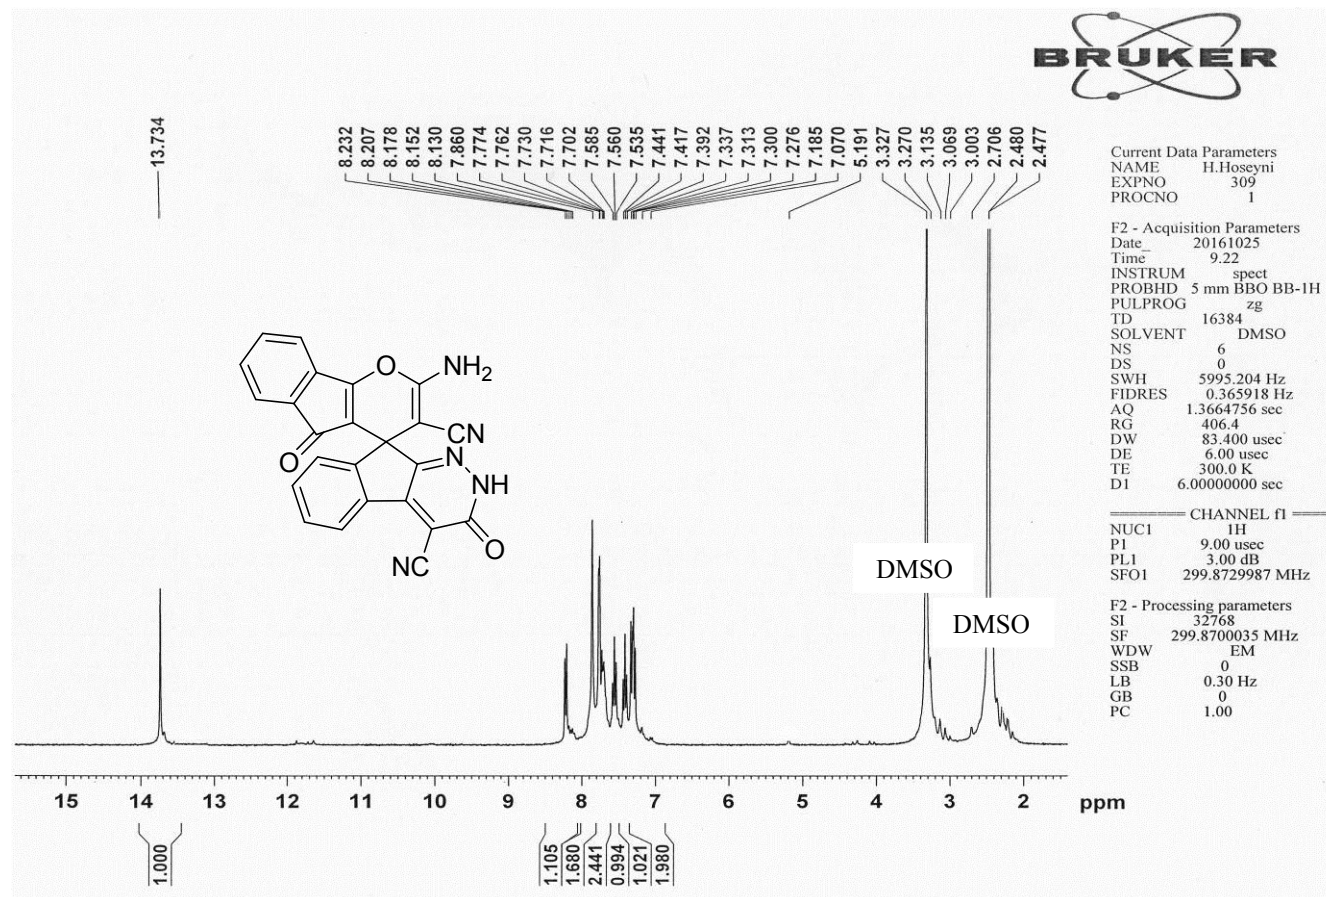

<sup>1</sup>H NMR of 5j

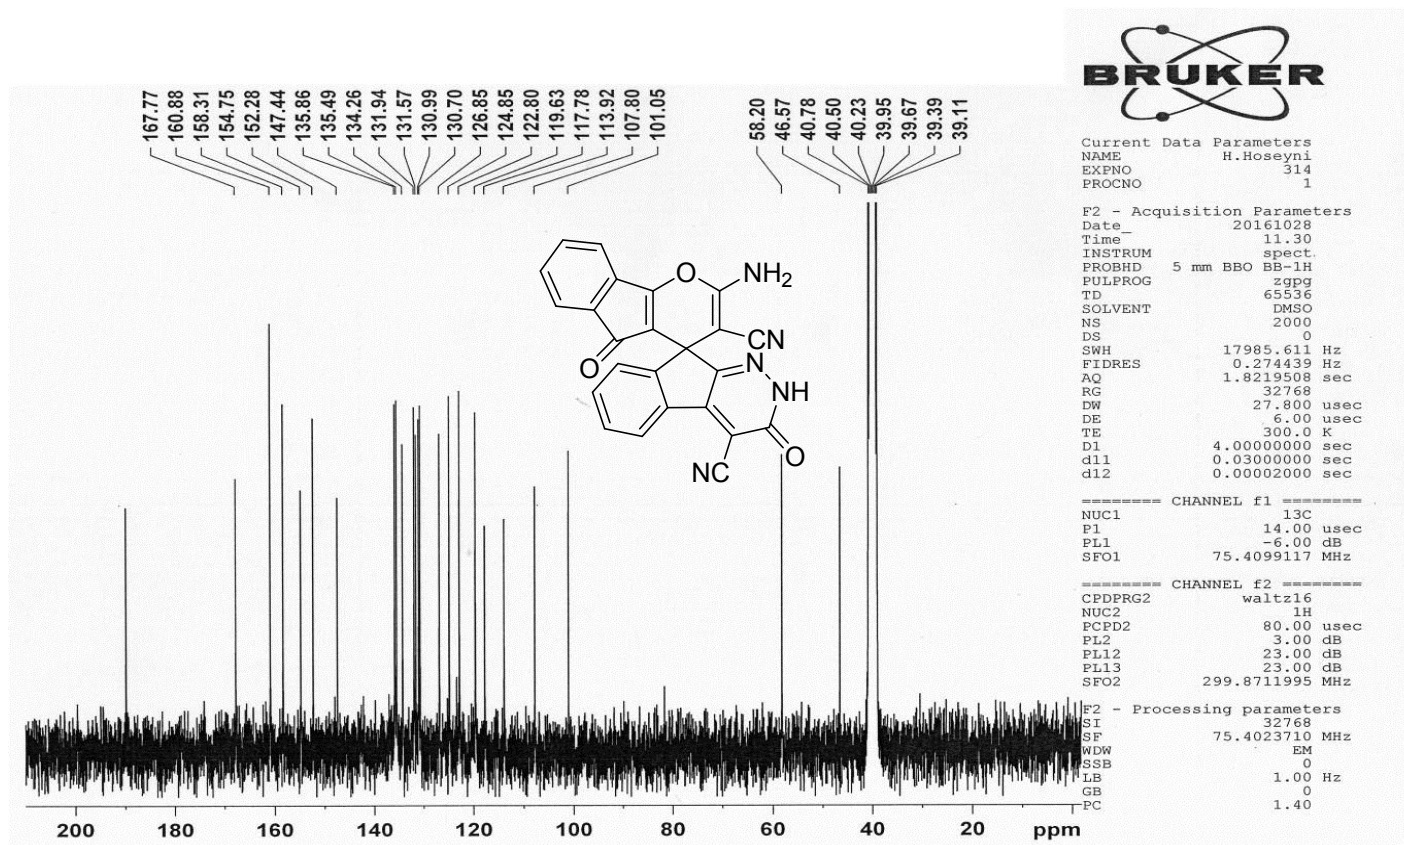<sup>13</sup>C NMR of 5j

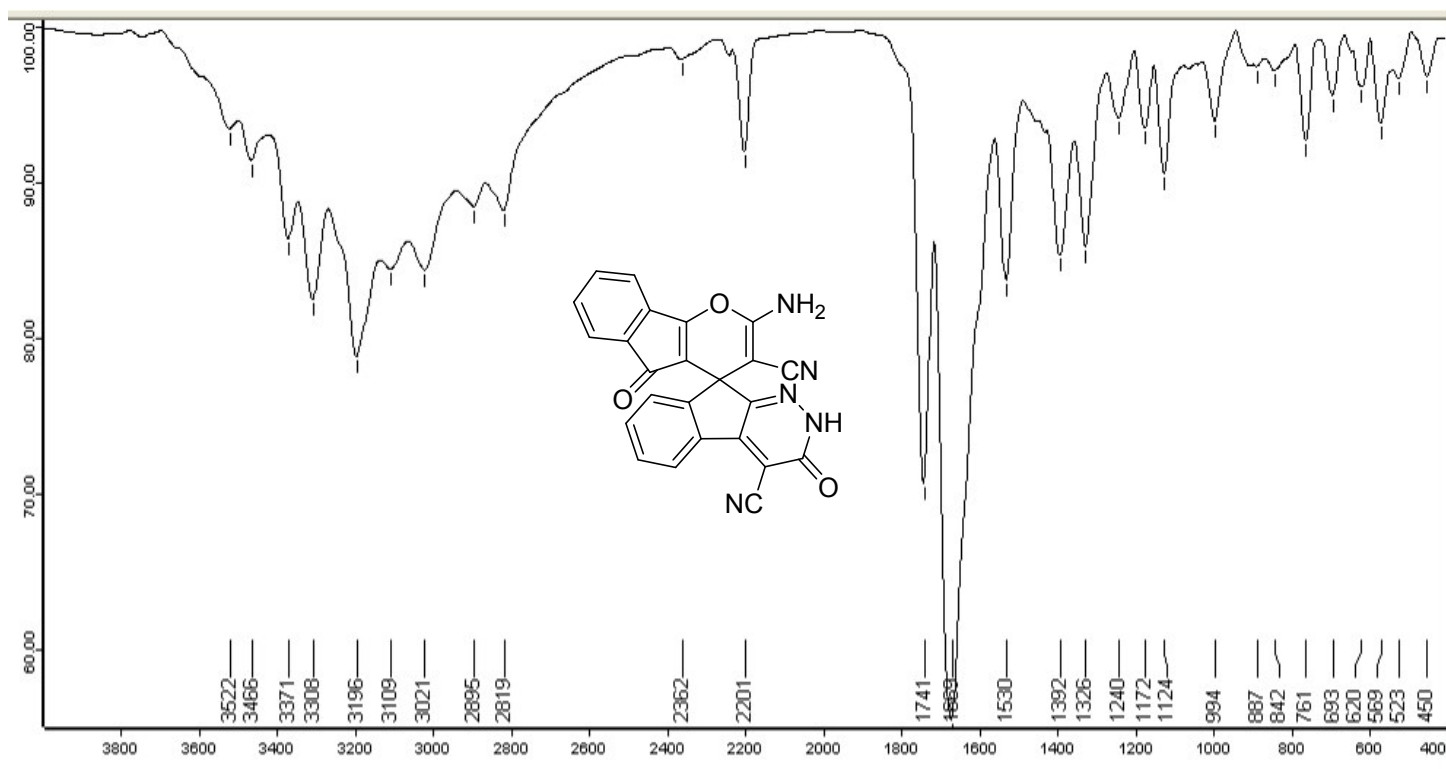

IR of 5j
